# Supplementary material for: Informing the development of the SUCCEED reporting guideline for studies on the scaling of health interventions: A systematic review
Source: PubMed Central journal article supplement (PMC10869056; doi:10.1097/md.0000000000037079), 2024-02-16
Supplement: medi-103-e37079-s004.pdf [file medi-103-e37079-s004.pdf]

| Id  | Title                                                | Authors names                              | Number of male authors | Number of female authors | Number of authors with non identified sex | Corresponding author | Institution                           | Country     | Year | language |
|-----|------------------------------------------------------|--------------------------------------------|------------------------|--------------------------|-------------------------------------------|----------------------|---------------------------------------|-------------|------|----------|
|     |                                                      |                                            |                        |                          |                                           |                      |                                       |             |      |          |
| S1  | Development of a checklist to assess the quality of  | Albrecht, Lauren ; Archibald, Mandy ;      | 0                      | 4                        | 0                                         | Scott, Shannon D     | University of Alberta                 | canada      | 2013 | English  |
| S2  | Evaluating the public health impact of health prom   | Glasgow, Russell; Vogt, Thomas; Boles, S   | 3                      | 0                        | 0                                         | Glasgow, Russell E   | AMC Cancer Researc                    | USA         | 1999 | English  |
| S3  | A framework for scaling up health interventions: k   | Barker, PM ;Reid, A ;Schall, MW ;          | 1                      | 2                        | 0                                         | Barker, Pierre M     | Institute for Healthc                 | USA         | 2016 | english  |
| S4  | Protecting the power of interventions through pro    | Vicki S, Conn ; Patricia S, Groves ;       | 0                      | 2                        | 0                                         | Conn, Vicki S        | University of Missou                  | USA         | 2011 | English  |
| S5  | Improving the reporting quality of nonrandomizec     | Des Jarlais, Don C. ;Lyles, Cynthia ;Crep  | 22                     | 4                        | 0                                         | Des Jarlais, Don C   | Beth Israel Medical C                 | USA         | 2004 | English  |
| S6  | Standardization of quality initiative reporting      | Duncan, James, R. ;Larson, David, B. ;Kri  | 3                      | 0                        | 0                                         | Kruska, Jonathan B   | Beth Israel Deacone                   | USA         | 2013 | English  |
| S7  | Reviewing evidence on complex social interventio     | Egan, M ; Bamba, C ; Petticrew, M ; Wh     | 2                      | 2                        | 0                                         | Egan, M              | University of Glasgo                  | UK          | 2008 | English  |
| S8  | Reporting guidelines for implementation and oper     | Hales, Simon ;Leshner-Trevino, Ana ;Ford   | 5                      | 1                        | 0                                         | Hales, Simon         | World Health Organ                    | Switzerland | 2016 | English  |
| S9  | Reporting standards for studies of tailored interve  | Harrington, nancy Grant ;noar, Seth M      | 1                      | 1                        | 0                                         | Harrington, nancy C  | University of Kentucki                | USA         | 2012 | English  |
| S10 | Better reporting of interventions: template for int  | Hoffmann, Tammy C ;Barbour, Virginia       | 8                      | 8                        | 0                                         | Hoffmann, Tammy C    | Bond University                       | UK          | 2014 | English  |
| S11 | Reporting on innovative public health interventio    | Huston, Patricia                           | 0                      | 1                        | 0                                         | Huston, Patricia     | Canadian Journal of                   | canada      | 2003 | English  |
| S12 | Programme Reporting Standards (PRS) for improv       | Kågesten, Anna E. ;Tunçalp, Özge ;Porte    | 3                      | 3                        | 0                                         | Tunçalp, Özge        | World Health Organi                   | Switzerland | 2017 | English  |
| S13 | Reporting of context and implementation in studi     | Luoto Jill ;Shekelle Paul G ;Maglione Ma   | 1                      | 4                        | 0                                         | Luoto, Jill          | RAND Corporation                      | USA         | 2014 | English  |
| S14 | The Oxford Implementation Index: a new tool for i    | Montgomery P ;Underhill K ;Gardner F ;     | 3                      | 2                        | 0                                         | Montgomery, P        | Centre for Evidence-                  | UK          | 2013 | English  |
| S15 | A Framework for Enhancing the Value of Research      | Neta Gila ;Glasgow Russell ;Carpenter Cl   | 4                      | 3                        | 0                                         | Neta, Gila           | National Cancer Insti                 | USA         | 2014 | English  |
| S16 | Development of a framework for reporting health      | O'Donnell Siobhan ;Li Linda C ;King Judy   | 0                      | 7                        | 0                                         | Li, Linda C.         | <a href="#">Arthritis Research Ce</a> | canada      | 2010 | English  |
| S17 | SQUIRE 2.0 (Standards for QQuality Improvement R     | Ogrinc G ; Davies L ; Goodman D ; Batalde  | 4                      | 2                        | 0                                         | Ogrinc, G            | White River Junction                  | USA         | 2016 | English  |
| S18 | Guidelines for reporting evaluations based on obs    | Mariona, Portell ;Anguera, M. Teresa ;C    | 1                      | 3                        | 0                                         | Portell, Mariona     | Universitat Autònorr                  | Spain       | 2015 | English  |
| S19 | Implementation strategies: recommendations for       | Proctor, Enola K ;Powell, Byron J ;McMil   | 2                      | 1                        | 0                                         | Proctor, Enola K     | Washington Universi                   | USA         | 2013 | English  |
| S20 | Economic evaluations of public health implement      | Reeves, p. ;Edmunds, K. ;Searles, A. ;W    | 2                      | 2                        | 0                                         | Reeves, P            | University of Newca                   | Australia   | 2019 | English  |
| S21 | Is reporting on interventions a weak link in unders  | Riley, Barbara L ;MacDonald, JoAnne ;N     | 0                      | 7                        | 0                                         | Riley, Barbara L     | University of Waterl                  | canada      | 2008 | English  |
| S22 | Reporting guidelines for implementation research     | Yousafzai, Aisha K ;Aboud, Frances E. ;n   | 0                      | 4                        | 0                                         | Yousafzai, Aisha K.  | Harvard University                    | USA         | 2018 | English  |
| S23 | A reporting guide for implementation science artic   | CCDR                                       | na                     | na                       | na                                        | na                   | Canada Communcial                     | canada      | 2016 | English  |
| S24 | A guide to scaling up population health interventio  | Milat, Andrew J ; Newson, Robyn ; King,    | 5                      | 3                        | 0                                         | Milat, Andrew J      | NSW Ministry of Hea                   | Australia   | 2016 | English  |
| S25 | Standards for Reporting Implementation Studies (     | Pinnock, Hilary ; Barwick, Melanie ; Carp  | 5                      | 7                        | 0                                         | Pinnock, H           | University of Edinbu                  | UK          | 2017 | English  |
| S26 | Guide for Monitoring Scale-up of Health Practices    | Adamou, Bridgit ; Curran, Jen ; Wilson, l  | 0                      | 8                        | 0                                         | na                   | MEASURE Evaluatio                     | USA         | 2014 | English  |
| S27 | Evaluating the scale-up for maternal and child sun   | Bryce, Jennifer ; Victora, Cesar G ; Boern | 4                      | 1                        | 0                                         | Bryce, Jennifer      | Johns Hopkins Unive                   | USA         | 2011 | English  |
| S28 | Every Newborn: health-systems bottlenecks and s      | Dickson, Kim E ; Simen-Kapeu, Aline ; Kii  | 4                      | 9                        | 0                                         | Dickson, Kim E       | UNICEF                                | USA         | 2014 | English  |
| S29 | Scaling Impact: Innovation for the Public Good       | McLean, Robert ; Gargani, John             | 2                      | 0                        | 0                                         | na                   | IDRC                                  | canada      | 2019 | English  |
| S30 | Pathways for scaling up public health intervention   | Indig, Devon ; Lee, Karen ; Grunseit, Anr  | 2                      | 3                        | 0                                         | Indig, Devon         | University of Sydney                  | Australia   | 2017 | English  |
| S31 | Beginning with the end in mind: planning pilot pro   | WHO                                        | na                     | na                       | na                                        | na                   | WHO-ExpandNet                         | Switzerland | 2011 | English  |
| S32 | The MAPS toolkit: mHealth assessment and planni      | WHO                                        | na                     | na                       | na                                        | na                   | World Health Organi                   | Switzerland | 2015 | English  |
| S33 | Ten dimensions of scaling up reproductive health     | US Agency for International Developmei     | na                     | na                       | na                                        | na                   | US Agency for Intern                  | USA         | 2002 | English  |
| S34 | Scaling up health service delivery: from pilot innov | Simmons, Ruth; Fajans, Peter; Ghiron L     | 1                      | 2                        | 0                                         | na                   | WHO                                   | Switzerland | 2007 | English  |
| S35 | An approach to rapid scale up Using HIV/AIDS trea    | WHO                                        | na                     | na                       | na                                        | na                   | WHO                                   | Switzerland | 2014 | English  |
| S36 | Scaling Up Global Health Interventions: A Propose    | Yamey, Gavin                               | 1                      | 0                        | 0                                         | Gavin Yamey          | Evidence-to-Policy Ir                 | USA         | 2011 | English  |
| S37 | Scaling Up—From Vision to Large-Scale Change A       | Larry, Cooley; Richard, Kohl; Rajani, R. V | 2                      | 1                        | 0                                         | na                   | Management System                     | USA         | 2016 | English  |
| S38 | A model for scale up of family health innovations    | Elizabeth H, Bradley; Leslie A, Curry; Lau | 2                      | 9                        | 0                                         | Elizabeth H, Bradley | Yale University                       | USA         | 2012 | English  |
| S39 | Scale up of services for mental health in low-incon  | Julian, Eaton; Layla, mcCay; Maya, Semr    | 5                      | 4                        | 0                                         | Julian, Eaton        | CBM International                     | Nigeria     | 2011 | English  |

| name of the Guideline                                                           | Acronym       | Extension | Main Guideline | objectives                                                                                                                                                  | Aim of the guideline                                                                                                        | Reporting guideline for implementation studies | Reporting guideline for scaling up studies | Guideline to design or conduct scaling up studies | Type of study other | Checklist | Comment checklist     |
|---------------------------------------------------------------------------------|---------------|-----------|----------------|-------------------------------------------------------------------------------------------------------------------------------------------------------------|-----------------------------------------------------------------------------------------------------------------------------|------------------------------------------------|--------------------------------------------|---------------------------------------------------|---------------------|-----------|-----------------------|
| Workgroup for Intervention RE-AIM                                               | na            | no        | na             | This article describes one solution to identify and provide evidence for public health interventions                                                        | to provide a framework for taking health interventions to scale                                                             | yes                                            | no                                         | no                                                | na                  | yes       | Table 1               |
| na                                                                              | na            | no        | na             | RE-AIM provides a framework to describe a framework for taking health interventions to scale                                                                | we describe a framework for taking health interventions to scale                                                            | no                                             | no                                         | yes                                               | na                  | yes       | http://www.re-aim.org |
| na                                                                              | na            | no        | na             | This article provides guidance and discusses intervention elements                                                                                          | discusses intervention elements                                                                                             | yes                                            | no                                         | no                                                | na                  | yes       | Table 1               |
| Transparent Reporting of Interventions (TREND)                                  | TREND         | no        | na             | present the initial version of the TREND reporting guideline                                                                                                | The TREND Reporting Guideline                                                                                               | yes                                            | no                                         | no                                                | na                  | yes       | table 1               |
| na                                                                              | na            | no        | na             | intends to standardize the reporting of interventions                                                                                                       | facilitate the preparation and reporting of interventions                                                                   | yes                                            | no                                         | no                                                | na                  | yes       | page 374              |
| na                                                                              | na            | no        | na             | To appraise the quality of reporting of interventions                                                                                                       | to appraise the reporting of interventions                                                                                  | yes                                            | no                                         | no                                                | na                  | yes       | table 2               |
| na                                                                              | na            | no        | na             | describe the development of the CONSORT SPIR reporting guideline                                                                                            | Enhancing research quality and reporting of interventions                                                                   | yes                                            | no                                         | no                                                | na                  | yes       | Table 2               |
| Reporting standards for interventions: a template for reporting and application | na            | no        | na             | The objective of this manuscript is to provide recommendations for tailoring reporting standards for interventions                                          | recommendations for tailoring reporting standards for interventions                                                         | yes                                            | no                                         | no                                                | na                  | yes       | table 1               |
| Template for intervention reporting (CONSORT SPIR)                              | CONSORT SPIR  | no        | na             | describes the methods used to develop the reporting guideline                                                                                               | The overarching purpose of the reporting guideline                                                                          | yes                                            | no                                         | no                                                | na                  | yes       | table 1               |
| Reviewer Guidelines for Intervention Reporting                                  | na            | no        | na             | The present article identifies key elements to offer a structured, yet flexible reporting guideline                                                         | to offer a structured, yet flexible reporting guideline                                                                     | yes                                            | no                                         | no                                                | na                  | yes       | table 1               |
| Programme Reporting Standards (PRS)                                             | PRS           | no        | na             | present results from these studies to provide guidance for commissioning                                                                                    | to provide guidance for commissioning                                                                                       | yes                                            | no                                         | no                                                | na                  | yes       | Table 5               |
| Global framework implementation (GFI)                                           | na            | no        | na             | to assess the current state of implementation research and to improve the design, conduct and reporting of implementation research                          | to improve the design, conduct and reporting of implementation research                                                     | yes                                            | no                                         | no                                                | na                  | yes       | table 1               |
| The Oxford Implementation Checklist (OxIC)                                      | na            | no        | na             | This article presents a new tool to identify a conceptual framework for systematic reviews on the identification of data related to implementation research | to identify a conceptual framework for systematic reviews on the identification of data related to implementation research  | yes                                            | no                                         | no                                                | na                  | yes       | table 1               |
| na                                                                              | na            | no        | na             | (1) to present and discuss implementation research findings that remain relevant                                                                            | to present and discuss implementation research findings that remain relevant                                                | yes                                            | no                                         | no                                                | na                  | no        | na                    |
| Framework for reporting implementation research (FRIR)                          | na            | no        | na             | The purpose of this study was to facilitate knowledge exchange and reporting of implementation research                                                     | to facilitate knowledge exchange and reporting of implementation research                                                   | yes                                            | no                                         | no                                                | na                  | yes       | Table 2               |
| Standards for Quality Improvement (SQUIRE 2.0)                                  | SQUIRE 2.0    | no        | na             | This article describes the development of SQUIRE 2.0 is intended for reporting of quality improvement research                                              | SQUIRE 2.0 is intended for reporting of quality improvement research                                                        | yes                                            | no                                         | no                                                | na                  | yes       | Table 1               |
| Guidelines for Reporting of Quality Improvement (GREOM)                         | GREOM         | no        | na             | The aim of this study was to develop a set of guidelines to address the challenges of reporting of quality improvement research                             | a set of guidelines to address the challenges of reporting of quality improvement research                                  | yes                                            | no                                         | no                                                | na                  | yes       | Table 1               |
| na                                                                              | na            | no        | na             | address the challenges of reporting of quality improvement research                                                                                         | to improve the reporting of quality improvement research                                                                    | yes                                            | no                                         | no                                                | na                  | yes       | Table 1               |
| na                                                                              | na            | no        | na             | The purpose of this study was to develop a set of guidelines to address the challenges of reporting of quality improvement research                         | conduct and reporting of quality improvement research                                                                       | yes                                            | no                                         | no                                                | na                  | yes       | Table 6               |
| na                                                                              | na            | no        | na             | this article presents preliminary findings on a set of guidelines to address the challenges of reporting of quality improvement research                    | we present a set of guidelines to address the challenges of reporting of quality improvement research                       | yes                                            | no                                         | no                                                | na                  | yes       | table 2 to 7          |
| consolidated advice for reporting of implementation research (C.A.R.E)          | C.A.R.E       | no        | na             | develop and disseminate guidance to support a transparent and consistent reporting of implementation research                                               | to support a transparent and consistent reporting of implementation research                                                | yes                                            | no                                         | no                                                | na                  | yes       | Table 1               |
| na                                                                              | na            | no        | na             | Because there has been little guidance on how to report implementation research, this checklist identifies what to report                                   | This checklist identifies what to report                                                                                    | yes                                            | no                                         | no                                                | na                  | yes       | table 1               |
| Increasing the scale of public health interventions (SCALE)                     | na            | no        | na             | i) how decisions to scale up describing a step-by-step process                                                                                              | describing a step-by-step process                                                                                           | no                                             | no                                         | yes                                               | na                  | yes       | Table 1               |
| Standards for Reporting of Implementation Research (StaRI)                      | StaRI         | no        | na             | The Standards for Reporting of Implementation Research (StaRI) Statesment and Checklist                                                                     | The StaRI Statesment and Checklist                                                                                          | yes                                            | no                                         | no                                                | na                  | yes       | Table 1               |
| Guide for Monitoring Scale-up (GMSU)                                            | na            | no        | na             | The main objective of this review is to provide guidance on how to monitor scale-up                                                                         | This guide is intended to provide guidance on how to monitor scale-up                                                       | no                                             | no                                         | yes                                               | na                  | no        | na                    |
| na                                                                              | na            | no        | na             | The need for a common evaluation framework for implementation research                                                                                      | presents such a framework for implementation research                                                                       | no                                             | no                                         | yes                                               | na                  | no        | na                    |
| na                                                                              | na            | no        | na             | In this paper, the fourth of the series of papers propose strategies to accelerate the scale-up of implementation research                                  | I propose strategies to accelerate the scale-up of implementation research                                                  | no                                             | no                                         | yes                                               | na                  | yes       | figure 2 page 4!      |
| na                                                                              | na            | no        | na             | presents an evidence-based tool to help you plan and report on implementation research                                                                      | It is intended to help you plan and report on implementation research                                                       | no                                             | no                                         | yes                                               | na                  | no        | na                    |
| na                                                                              | na            | no        | na             | The aim of this paper is to identify key elements to characterise the scaling up of implementation research                                                 | to characterise the scaling up of implementation research                                                                   | no                                             | no                                         | yes                                               | na                  | no        | na                    |
| na                                                                              | na            | no        | na             | presenting recommendations on how to report on implementation research                                                                                      | This guide contains 12 recommendations on how to report on implementation research                                          | no                                             | no                                         | yes                                               | na                  | yes       | table page 12         |
| mHealth Assessment and Reporting (MAPS Tool)                                    | The MAPS Tool | no        | na             | to help project teams conduct mHealth assessment and reporting                                                                                              | to help project teams conduct mHealth assessment and reporting                                                              | no                                             | no                                         | yes                                               | na                  | yes       | Figure 2              |
| na                                                                              | na            | no        | na             | introduction to a series of issues related to the reporting of mHealth assessment and reporting                                                             | introduction to a series of issues related to the reporting of mHealth assessment and reporting                             | no                                             | no                                         | yes                                               | na                  | no        | na                    |
| ExpandNet/WHO framework for reporting of implementation research                | na            | no        | na             | drawing attention to insights from the process of implementation research                                                                                   | drawing attention to insights from the process of implementation research                                                   | no                                             | no                                         | yes                                               | na                  | no        | na                    |
| Multiplicative scale-up framework for explaining implementation research        | na            | no        | na             | provides general guidance on how to report on implementation research                                                                                       | steps are those recommended in the reporting guideline                                                                      | no                                             | no                                         | yes                                               | na                  | yes       | box 6                 |
| framework for explaining implementation research (SUM Framework)                | na            | no        | na             | draw upon key themes in the literature to use in thinking about strategies for implementing a new program, policy, or intervention                          | to use in thinking about strategies for implementing a new program, policy, or intervention                                 | yes                                            | no                                         | yes                                               | na                  | no        | na                    |
| Scaling Up Management (SUM Framework)                                           | SUM Framework | no        | na             | To provide an easily understood and practical tool and straightforward guidance on how to report on implementation research                                 | to provide an easily understood and practical tool and straightforward guidance on how to report on implementation research | yes                                            | no                                         | yes                                               | na                  | no        | checklist scalab      |
| AIDED model for scale up of implementation research                             | na            | na        | na             | To develop an integrated and practical tool and straightforward guidance on how to report on implementation research                                        | to develop an integrated and practical tool and straightforward guidance on how to report on implementation research        | no                                             | no                                         | yes                                               | na                  | yes       | fig3                  |
| na                                                                              | na            | na        | na             | aimed to gather as comprehensive a picture as possible of how to take forward the process of implementation research                                        | how to take forward the process of implementation research                                                                  | no                                             | no                                         | yes                                               | na                  | no        | na                    |

| Flowchart | Comment flowchart | Number of items | items id  | Theoretical framework | name of the theory        | Number of stakeholders involved in the project | Patient involved as stakeholder | Number of patient stakeholders | number of female patient stakeholder | number of male patient stakeholder | Clinician involved as stakeholders | Number of clinician stakeholders | number of female clinician stakeholders |
|-----------|-------------------|-----------------|-----------|-----------------------|---------------------------|------------------------------------------------|---------------------------------|--------------------------------|--------------------------------------|------------------------------------|------------------------------------|----------------------------------|-----------------------------------------|
| no        | na                | 20              | 1 - 20    | no                    | na                        | 32                                             | no                              | na                             | na                                   | na                                 | no                                 | na                               | na                                      |
| no        | na                | 31              | 21 - 51   | no                    | na                        | 11                                             | no                              | na                             | na                                   | na                                 | no                                 | na                               | na                                      |
| yes       | figure 3          | 4               | 52 - 55   | no                    | na                        | 3                                              | no                              | na                             | na                                   | na                                 | no                                 | na                               | na                                      |
| no        | na                | 5               | 56 - 60   | no                    | na                        | 2                                              | no                              | na                             | na                                   | na                                 | no                                 | na                               | na                                      |
| no        | na                | 58              | 61 - 118  | no                    | na                        | 26                                             | no                              | na                             | na                                   | na                                 | no                                 | na                               | na                                      |
| no        | na                | 21              | 119 - 139 | no                    | na                        | 3                                              | no                              | na                             | na                                   | na                                 | yes                                | 3                                | 0                                       |
| no        | na                | 10              | 140 - 149 | no                    | na                        | 4                                              | no                              | na                             | na                                   | na                                 | no                                 | na                               | na                                      |
| no        | na                | 64              | 150 - 213 | no                    | na                        | 6                                              | no                              | na                             | na                                   | na                                 | no                                 | na                               | na                                      |
| no        | na                | 7               | 214 - 220 | no                    | na                        | 2                                              | no                              | na                             | na                                   | na                                 | no                                 | na                               | na                                      |
| no        | na                | 12              | 221 - 232 | yes                   | framework for develc      | 16                                             | no                              | na                             | na                                   | na                                 | no                                 | na                               | na                                      |
| no        | na                | 19              | 233 - 251 | no                    | na                        | 1                                              | no                              | na                             | na                                   | na                                 | no                                 | na                               | na                                      |
| no        | na                | 47              | 252 - 298 | no                    | na                        | 6                                              | no                              | na                             | na                                   | na                                 | no                                 | na                               | na                                      |
| no        | na                | 17              | 299 - 315 | no                    | na                        | 5                                              | no                              | na                             | na                                   | na                                 | no                                 | na                               | na                                      |
| no        | na                | 32              | 316 - 347 | no                    | na                        | 5                                              | no                              | na                             | na                                   | na                                 | no                                 | na                               | na                                      |
| yes       | figure 1          | 30              | 348 - 377 | no                    | na                        | 23                                             | no                              | na                             | na                                   | na                                 | yes                                | 1                                | 0                                       |
| no        | na                | 10              | 378 - 387 | no                    | na                        | 8                                              | no                              | na                             | na                                   | na                                 | yes                                | 2                                | 2                                       |
| no        | na                | 40              | 388 - 427 | no                    | na                        | 39                                             | no                              | na                             | na                                   | na                                 | yes                                | 7                                | 7                                       |
| no        | na                | 14              | 428 - 441 | no                    | na                        | 4                                              | no                              | na                             | na                                   | na                                 | no                                 | na                               | na                                      |
| no        | na                | 10              | 442 - 451 | no                    | na                        | 3                                              | no                              | na                             | na                                   | na                                 | no                                 | na                               | na                                      |
| no        | na                | 8               | 452 - 459 | no                    | na                        | 4                                              | no                              | na                             | na                                   | na                                 | no                                 | na                               | na                                      |
| no        | na                | 16              | 460 - 475 | yes                   | Multiple Intervention:    | 7                                              | no                              | na                             | na                                   | na                                 | no                                 | na                               | na                                      |
| no        | na                | 21              | 476 - 496 | no                    | na                        | 4                                              | no                              | na                             | na                                   | na                                 | no                                 | na                               | na                                      |
| no        | na                | 20              | 497 - 516 | no                    | na                        | na                                             | na                              | na                             | na                                   | na                                 | na                                 | na                               | na                                      |
| no        | na                | 20              | 517 - 536 | no                    | na                        | 8                                              | no                              | na                             | na                                   | na                                 | no                                 | na                               | na                                      |
| no        | na                | 37              | 537 - 573 | no                    | na                        | 14                                             | no                              | na                             | na                                   | na                                 | unclear                            | na                               | na                                      |
| no        | na                | 10              | 574 - 583 | no                    | na                        | 8                                              | no                              | na                             | na                                   | na                                 | no                                 | na                               | na                                      |
| yes       | figure 2          | 7               | 584 - 590 | no                    | na                        | 5                                              | no                              | na                             | na                                   | na                                 | no                                 | na                               | na                                      |
| no        | na                | 4               | 591 - 594 | no                    | na                        | 17                                             | no                              | na                             | na                                   | na                                 | yes                                | 1                                | 1                                       |
| yes       | figure 2          | 12              | 595 - 606 | no                    | na                        | 4                                              | no                              | na                             | na                                   | na                                 | no                                 | na                               | na                                      |
| yes       | fig,2             | 6               | 607 - 612 | no                    | na                        | 5                                              | no                              | na                             | na                                   | na                                 | no                                 | na                               | na                                      |
| no        | na                | 12              | 613 - 624 | yes                   | ExpandNet/WHO fran        | 3                                              | no                              | na                             | na                                   | na                                 | no                                 | na                               | na                                      |
| no        | na                | 38              | 625 - 662 | no                    | na                        | 13                                             | no                              | na                             | na                                   | na                                 | no                                 | na                               | na                                      |
| no        | na                | 10              | 663 - 672 | no                    | na                        | na                                             | na                              | na                             | na                                   | na                                 | na                                 | na                               | na                                      |
| yes       | fig1              | 27              | 673 - 699 | no                    | na                        | 3                                              | no                              | na                             | na                                   | na                                 | no                                 | na                               | na                                      |
| no        | na                | 17              | 700 - 716 | yes                   | BTS collaborative lear na | na                                             | na                              | na                             | na                                   | na                                 | na                                 | na                               | na                                      |
| no        | na                | 6               | 717 - 722 | no                    | na                        | 1                                              | no                              | na                             | na                                   | na                                 | no                                 | na                               | na                                      |
| no        | na                | 14              | 723 - 736 | yes                   | strategic managemen       | 3                                              | no                              | na                             | na                                   | na                                 | no                                 | na                               | na                                      |
| no        | na                | 5               | 737-741   | no                    | na                        | 11                                             | no                              | na                             | na                                   | na                                 | no                                 | na                               | na                                      |
| yes       | figure 3          | 9               | 742-750   | no                    | na                        | 9                                              | no                              | na                             | na                                   | na                                 | yes                                | 1                                | 0                                       |

| number of male clinician stakeholders | Decision or policy maker involved as stakeholders | Number of decision or policy maker involved as stakeholders | number of female decision/policy maker stakeholders | number of male decision/policy maker stakeholders | Journal editor involved as stakeholder | Number of journal editor involved as stakeholder | number of female journal editor stakeholder | number of male Journal editor stakeholder | Funding organisation member as stakeholder | Number of funding organisation member stakeholder | Number of female stakeholder from funding organization | Number of male stakeholder from funding organization |   |
|---------------------------------------|---------------------------------------------------|-------------------------------------------------------------|-----------------------------------------------------|---------------------------------------------------|----------------------------------------|--------------------------------------------------|---------------------------------------------|-------------------------------------------|--------------------------------------------|---------------------------------------------------|--------------------------------------------------------|------------------------------------------------------|---|
| na                                    | no                                                | na                                                          | na                                                  | na                                                | yes                                    |                                                  | 2                                           | 2                                         | 0 no                                       | na                                                | na                                                     | na                                                   |   |
| na                                    | no                                                | na                                                          | na                                                  | na                                                | no                                     | na                                               | na                                          | na                                        | yes                                        |                                                   | 1                                                      | 1                                                    | 0 |
| na                                    | no                                                | na                                                          | na                                                  | na                                                | no                                     | na                                               | na                                          | na                                        | no                                         | na                                                | na                                                     | na                                                   |   |
| na                                    | no                                                | na                                                          | na                                                  | na                                                | no                                     | na                                               | na                                          | na                                        | no                                         | na                                                | na                                                     | na                                                   |   |
| na                                    | yes                                               |                                                             | 6                                                   | 4                                                 | 2 yes                                  |                                                  | 17                                          | 0                                         | 17 no                                      | na                                                | na                                                     | na                                                   |   |
|                                       | 3 no                                              | na                                                          | na                                                  | na                                                | no                                     | na                                               | na                                          | na                                        | no                                         | na                                                | na                                                     | na                                                   |   |
| na                                    | no                                                | na                                                          | na                                                  | na                                                | no                                     | na                                               | na                                          | na                                        | no                                         | na                                                | na                                                     | na                                                   |   |
| na                                    | yes                                               |                                                             | 6                                                   | 1                                                 | 5 no                                   | na                                               | na                                          | na                                        | no                                         | na                                                | na                                                     | na                                                   |   |
| na                                    | no                                                | na                                                          | na                                                  | na                                                | no                                     | na                                               | na                                          | na                                        | no                                         | na                                                | na                                                     | na                                                   |   |
| na                                    | no                                                | na                                                          | na                                                  | na                                                | yes                                    |                                                  | 2                                           | 2                                         | 0 no                                       | na                                                | na                                                     | na                                                   |   |
| na                                    | no                                                | na                                                          | na                                                  | na                                                | yes                                    |                                                  | 1                                           | 1                                         | 0 no                                       | na                                                | na                                                     | na                                                   |   |
| na                                    | yes                                               |                                                             | 5                                                   | 2                                                 | 3 no                                   | na                                               | na                                          | na                                        | no                                         | na                                                | na                                                     | na                                                   |   |
| na                                    | no                                                | na                                                          | na                                                  | na                                                | no                                     | na                                               | na                                          | na                                        | no                                         | na                                                | na                                                     | na                                                   |   |
| na                                    | no                                                | na                                                          | na                                                  | na                                                | no                                     | na                                               | na                                          | na                                        | no                                         | na                                                | na                                                     | na                                                   |   |
|                                       | 1 yes                                             |                                                             | 5                                                   | 4                                                 | 1 no                                   | na                                               | na                                          | na                                        | no                                         | na                                                | na                                                     | na                                                   |   |
|                                       | 0 no                                              | na                                                          | na                                                  | na                                                | no                                     | na                                               | na                                          | na                                        | no                                         | na                                                | na                                                     | na                                                   |   |
|                                       | 0 yes                                             |                                                             | 4                                                   | 2                                                 | 2 yes                                  |                                                  | 1                                           | 0                                         | 1 no                                       | na                                                | na                                                     | na                                                   |   |
| na                                    | no                                                | na                                                          | na                                                  | na                                                | no                                     | na                                               | na                                          | na                                        | no                                         | na                                                | na                                                     | na                                                   |   |
| na                                    | no                                                | na                                                          | na                                                  | na                                                | no                                     | na                                               | na                                          | na                                        | no                                         | na                                                | na                                                     | na                                                   |   |
| na                                    | no                                                | na                                                          | na                                                  | na                                                | no                                     | na                                               | na                                          | na                                        | no                                         | na                                                | na                                                     | na                                                   |   |
| na                                    | no                                                | na                                                          | na                                                  | na                                                | no                                     | na                                               | na                                          | na                                        | no                                         | na                                                | na                                                     | na                                                   |   |
| na                                    | na                                                | na                                                          | na                                                  | na                                                | na                                     | na                                               | na                                          | na                                        | na                                         | na                                                | na                                                     | na                                                   |   |
| na                                    | no                                                | na                                                          | na                                                  | na                                                | no                                     | na                                               | na                                          | na                                        | no                                         | na                                                | na                                                     | na                                                   |   |
| na                                    | no                                                | na                                                          | na                                                  | na                                                | no                                     | na                                               | na                                          | na                                        | yes                                        |                                                   | 2                                                      | 2                                                    | 0 |
| na                                    | yes                                               | na                                                          | na                                                  | na                                                | no                                     | na                                               | na                                          | na                                        | yes                                        | na                                                | na                                                     | na                                                   |   |
| na                                    | yes                                               |                                                             | 1                                                   | 0                                                 | 1 no                                   | na                                               | na                                          | na                                        | no                                         | na                                                | na                                                     | na                                                   |   |
|                                       | 0 yes                                             |                                                             | 11                                                  | 8                                                 | 3 no                                   | na                                               | na                                          | na                                        | yes                                        |                                                   | 1                                                      | 0                                                    | 1 |
| na                                    | yes                                               |                                                             | 1                                                   | 0                                                 | 1 no                                   | na                                               | na                                          | na                                        | yes                                        |                                                   | 3                                                      | 1                                                    | 2 |
| na                                    | yes                                               |                                                             | 1                                                   | 0                                                 | 1 no                                   | na                                               | na                                          | na                                        | no                                         | na                                                | na                                                     | na                                                   |   |
| na                                    | yes                                               |                                                             | 1                                                   | 1                                                 | 0 no                                   | na                                               | na                                          | na                                        | yes                                        |                                                   | 1                                                      | 0                                                    | 1 |
| na                                    | yes                                               |                                                             | 7                                                   | 5                                                 | 2 no                                   | na                                               | na                                          | na                                        | yes                                        |                                                   | 2                                                      | 1                                                    | 1 |
| na                                    | na                                                | na                                                          | na                                                  | na                                                | na                                     | na                                               | na                                          | na                                        | na                                         | na                                                | na                                                     | na                                                   |   |
| na                                    | yes                                               |                                                             | 1                                                   | 1                                                 | 0 no                                   | na                                               | na                                          | na                                        | yes                                        |                                                   | 1                                                      | 0                                                    | 1 |
| na                                    | na                                                | na                                                          | na                                                  | na                                                | na                                     | na                                               | na                                          | na                                        | na                                         | na                                                | na                                                     | na                                                   |   |
| na                                    | no                                                | na                                                          | na                                                  | na                                                | no                                     | na                                               | na                                          | na                                        | no                                         | na                                                | na                                                     | na                                                   |   |
| na                                    | yes                                               |                                                             | 3                                                   | 1                                                 | 2 no                                   | na                                               | na                                          | na                                        | no                                         | na                                                | na                                                     | na                                                   |   |
| na                                    | no                                                | na                                                          | na                                                  | na                                                | no                                     | na                                               | na                                          | na                                        | no                                         | na                                                | na                                                     | na                                                   |   |
|                                       | 1 yes                                             |                                                             | 3                                                   | 2                                                 | 1 no                                   | na                                               | na                                          | na                                        | no                                         | na                                                | na                                                     | na                                                   |   |





| number of male funders as panelist | Decision Maker as panelist | Number of DM as panelist | Number of female DM as panelist | Number of male DM as panelist | Journal editor as panelist | Number of Journal editor as panelist | Number of female journal editor as panelist | Number of male journal editor as panelist | systematic review | litterature review | observational study | qualitative research study | randomize d trial | Type of data source other | presence of sex related word |    |
|------------------------------------|----------------------------|--------------------------|---------------------------------|-------------------------------|----------------------------|--------------------------------------|---------------------------------------------|-------------------------------------------|-------------------|--------------------|---------------------|----------------------------|-------------------|---------------------------|------------------------------|----|
| na                                 | no                         | na                       | na                              | na                            | no                         | na                                   | na                                          | na                                        | yes               | no                 | no                  | no                         | no                | na                        | no                           |    |
| na                                 | na                         | na                       | na                              | na                            | na                         | na                                   | na                                          | na                                        | no                | unclear            | no                  | no                         | no                | na                        | no                           |    |
| na                                 | na                         | na                       | na                              | na                            | na                         | na                                   | na                                          | na                                        | no                | yes                | no                  | no                         | no                | na                        | no                           |    |
| na                                 | na                         | na                       | na                              | na                            | na                         | na                                   | na                                          | na                                        | no                | yes                | no                  | no                         | no                | na                        | no                           |    |
| na                                 | yes                        |                          | 6                               | 4                             | 2                          | yes                                  |                                             | 17                                        | 0                 | 17                 | no                  | yes                        | no                | no                        | no                           |    |
| na                                 | na                         | na                       | na                              | na                            | na                         | na                                   | na                                          | na                                        | na                | no                 | no                  | no                         | no                | no                        | no                           |    |
| na                                 | na                         | na                       | na                              | na                            | na                         | na                                   | na                                          | na                                        | yes               | no                 | no                  | no                         | no                | no                        | no                           |    |
| na                                 | unclear                    | na                       | na                              | na                            | yes                        | na                                   | na                                          | na                                        | no                | yes                | no                  | no                         | no                | no                        | no                           |    |
| na                                 | na                         | na                       | na                              | na                            | na                         | na                                   | na                                          | na                                        | no                | yes                | no                  | no                         | no                | no                        | no                           |    |
| na                                 | no                         | na                       | na                              | na                            | yes                        |                                      | 12                                          | na                                        | na                | no                 | yes                 | no                         | no                | no                        | no                           |    |
| na                                 | na                         | na                       | na                              | na                            | na                         | na                                   | na                                          | na                                        | no                | no                 | no                  | no                         | no                | no                        | no                           |    |
| na                                 | yes                        | na                       | na                              | na                            | unclear                    | na                                   | na                                          | na                                        | yes               | no                 | no                  | no                         | no                | na                        | no                           |    |
|                                    | 1                          | yes                      |                                 | 11                            | 2                          | 9                                    | no                                          | na                                        | na                | na                 | no                  | no                         | no                | no                        | Expert opinion               | no |
| na                                 | na                         | na                       | na                              | na                            | na                         | na                                   | na                                          | na                                        | yes               | no                 | no                  | no                         | no                | no                        | no                           |    |
| na                                 | yes                        |                          | 5                               | 4                             | 1                          | no                                   | na                                          | na                                        | na                | no                 | no                  | no                         | no                | no                        | Expert opinion               | no |
| na                                 | no                         | na                       | na                              | na                            | no                         | na                                   | na                                          | na                                        | yes               | no                 | no                  | no                         | no                | no                        | no                           |    |
| na                                 | yes                        | na                       | na                              | na                            | yes                        | na                                   | na                                          | na                                        | no                | yes                | no                  | no                         | no                | na                        | no                           |    |
| na                                 | na                         | na                       | na                              | na                            | na                         | na                                   | na                                          | na                                        | no                | yes                | no                  | no                         | no                | na                        | no                           |    |
| na                                 | na                         | na                       | na                              | na                            | na                         | na                                   | na                                          | na                                        | no                | yes                | no                  | no                         | no                | na                        | no                           |    |
| na                                 | na                         | na                       | na                              | na                            | na                         | na                                   | na                                          | na                                        | no                | yes                | no                  | no                         | no                | no                        | no                           |    |
| na                                 | yes                        |                          | 1                               | 1                             | 0                          | no                                   | na                                          | na                                        | na                | no                 | yes                 | no                         | no                | no                        | no                           |    |
| na                                 | na                         | na                       | na                              | na                            | na                         | na                                   | na                                          | na                                        | no                | yes                | no                  | no                         | no                | no                        | no                           |    |
| na                                 | yes                        | na                       | na                              | na                            | no                         | na                                   | na                                          | na                                        | yes               | no                 | no                  | yes                        | no                | na                        | no                           |    |
| na                                 | no                         | na                       | na                              | na                            | yes                        |                                      | 6                                           | na                                        | na                | yes                | no                  | no                         | no                | no                        | no                           |    |
| na                                 | na                         | na                       | na                              | na                            | na                         | na                                   | na                                          | na                                        | na                | na                 | na                  | na                         | na                | na                        | no                           |    |
| na                                 | na                         | na                       | na                              | na                            | na                         | na                                   | na                                          | na                                        | no                | yes                | no                  | no                         | no                | na                        | no                           |    |
| na                                 | yes                        | na                       | na                              | na                            | na                         | na                                   | na                                          | na                                        | yes               | no                 | no                  | no                         | no                | na                        | no                           |    |
| na                                 | yes                        | na                       | na                              | na                            | unclear                    | na                                   | na                                          | na                                        | no                | yes                | no                  | no                         | no                | na                        | no                           |    |
| na                                 | na                         | na                       | na                              | na                            | na                         | na                                   | na                                          | na                                        | no                | yes                | no                  | no                         | no                | na                        | no                           |    |
| na                                 | na                         | na                       | na                              | na                            | na                         | na                                   | na                                          | na                                        | na                | yes                | na                  | na                         | na                | field experience          | no                           |    |
| na                                 | yes                        | na                       | na                              | na                            | na                         | na                                   | na                                          | na                                        | na                | yes                | no                  | yes                        | no                | Expert opinion            | no                           |    |
| na                                 | na                         | na                       | na                              | na                            | na                         | na                                   | na                                          | na                                        | na                | na                 | na                  | na                         | na                | na                        | no                           |    |
| na                                 | yes                        | na                       | na                              | na                            | no                         | na                                   | na                                          | na                                        | no                | yes                | no                  | no                         | no                | interview                 | no                           |    |
| na                                 | na                         | na                       | na                              | na                            | na                         | na                                   | na                                          | na                                        | na                | na                 | na                  | na                         | na                | na                        | no                           |    |
| na                                 | na                         | na                       | na                              | na                            | na                         | na                                   | na                                          | na                                        | no                | yes                | no                  | no                         | no                | interview                 | no                           |    |
| na                                 | na                         | na                       | na                              | na                            | na                         | na                                   | na                                          | na                                        | na                | na                 | na                  | na                         | na                | field work                | no                           |    |
| na                                 | na                         | na                       | na                              | na                            | na                         | na                                   | na                                          | na                                        | yes               | no                 | no                  | yes                        | no                | no                        | no                           |    |
| na                                 | na                         | na                       | na                              | na                            | na                         | na                                   | na                                          | na                                        | yes               | no                 | no                  | no                         | no                | survey                    | no                           |    |

| sex info | correct sex | presence of gender related word | gender info  | correct gender | Validation | type of validation        | funding source | funding source detail                                               | Funding source classification | conflict of interest | presence of conflict of interest |
|----------|-------------|---------------------------------|--------------|----------------|------------|---------------------------|----------------|---------------------------------------------------------------------|-------------------------------|----------------------|----------------------------------|
| na       | na          | no                              | na           | na             | no         | na                        | yes            | KRS 102071)                                                         | public funding                | yes                  | no                               |
| na       | na          | no                              | na           | na             | no         | na                        | yes            | national Institutes of Health (RO1 DK5                              | public funding                | no                   | na                               |
| na       | na          | no                              | na           | na             | yes        | testing                   | yes            | funding from Kaiser Permanente                                      | private funding               | yes                  | no                               |
| na       | na          | no                              | na           | na             | no         | na                        | yes            | national Institutes of Health (RO1NRO)                              | public funding                | no                   | na                               |
| na       | na          | no                              | na           | na             | no         | na                        | no             | na                                                                  | na                            | no                   | na                               |
| na       | na          | no                              | na           | na             | no         | na                        | no             | na                                                                  | na                            | no                   | na                               |
| na       | na          | no                              | na           | na             | yes        | pilot testing             | yes            | ESRC grant no. H141251011 (as part of the ESRC Centre for Evidence- | public funding                | yes                  | no                               |
| na       | na          | no                              | na           | na             | yes        | pilot testing             | yes            | Special Programme for Research and                                  | public funding                | yes                  | no                               |
| na       | na          | no                              | na           | na             | yes        | expert feedback           | no             | na                                                                  | na                            | yes                  | no                               |
| na       | na          | no                              | na           | na             | yes        | pilot testing             | yes            | NIHR Senior Investigator Award; Aust                                | private & public funding      | yes                  | no                               |
| na       | na          | no                              | na           | na             | no         | na                        | no             | na                                                                  | na                            | no                   | na                               |
| na       | na          | yes                             | item 259, 26 | unclear        | yes        | pilot testing             | yes            | the Alliance for Health Policy and Syst                             | public funding                | yes                  | no                               |
| na       | na          | no                              | na           | na             | yes        | pilot testing             | yes            | PGS. Administrative, technical or mat                               | public funding                | yes                  | no                               |
| na       | na          | no                              | na           | na             | no         | na                        | yes            | the Brown University Alcohol Research                               | public funding                | yes                  | no                               |
| na       | na          | no                              | na           | na             | no         | na                        | yes            | This work was partially funded by the                               | public funding                | no                   | na                               |
| na       | na          | no                              | na           | na             | no         | na                        | yes            | the Physiotherapy Foundation of                                     | na                            | na                   | na                               |
| na       | na          | no                              | na           | na             | no         | na                        | yes            | Canada through the Alberta                                          | private & public funding      | yes                  | no                               |
| na       | na          | no                              | na           | na             | yes        | pilot test & expert feed  | yes            | Robert Wood Johnson Foundation (gr                                  | private funding               | yes                  | no                               |
| na       | na          | no                              | na           | na             | no         | na                        | yes            | Grant DEP2012- 32124]; 2) the Gener                                 | public funding                | no                   | na                               |
| na       | na          | no                              | na           | na             | no         | na                        | yes            | national Center for Research Resource                               | public funding                | yes                  | na                               |
| item 454 | unclear     | no                              | na           | na             | no         | na                        | yes            | none                                                                | na                            | yes                  | no                               |
| na       | na          | no                              | na           | na             | no         | na                        | yes            | Contributions were supported by awa                                 | private & public funding      | yes                  | no                               |
| na       | na          | no                              | na           | na             | no         | na                        | yes            | New York Academy of Sciences UNIC                                   | public funding                | yes                  | no                               |
| na       | na          | no                              | na           | na             | no         | na                        | no             | na                                                                  | na                            | no                   | na                               |
| na       | na          | no                              | na           | na             | no         | na                        | yes            | New South Wales Ministry of Health (                                | public funding                | yes                  | no                               |
| na       | na          | no                              | na           | na             | no         | na                        | yes            | Asthma UK Centre for Applied Resear                                 | public funding                | yes                  | no                               |
| na       | na          | no                              | na           | na             | no         | na                        | no             | na                                                                  | na                            | no                   | na                               |
| na       | na          | no                              | na           | na             | no         | na                        | yes            | Canadian CIDA and the Bill & Melinda                                | private & public funding      | yes                  | no                               |
| na       | na          | no                              | na           | na             | yes        | pilot testing             | yes            | grant from USAID to UNICEF, and for                                 | private & public funding      | yes                  | no                               |
| na       | na          | no                              | na           | na             | no         | na                        | yes            | International Development Research                                  | public funding                | no                   | na                               |
| na       | na          | no                              | na           | na             | no         | na                        | yes            | the national Health and Medical Resear                              | public funding                | yes                  | na                               |
| na       | na          | yes                             | item 616     | yes            | no         | na                        | yes            | Financial support from the David and                                | private & public funding      | no                   | na                               |
| na       | na          | no                              | na           | na             | yes        | pilot test, expert feedba | yes            | WHO and UNF are grateful to Helga F                                 | private & public funding      | no                   | na                               |
| na       | na          | yes                             | item 666     | unclear        | no         | na                        | no             | na                                                                  | na                            | no                   | na                               |
| na       | na          | no                              | na           | na             | no         | na                        | yes            | the financial support received from tl                              | private & public funding      | no                   | na                               |
| na       | na          | no                              | na           | na             | no         | na                        | no             | na                                                                  | na                            | no                   | na                               |
| na       | na          | no                              | na           | na             | no         | na                        | yes            | no funding was received for this work                               | na                            | yes                  | yes                              |
| na       | na          | no                              | na           | na             | no         | na                        | yes            | generous support from the John D an                                 | private funding               | no                   | na                               |
| na       | na          | no                              | na           | na             | no         | na                        | yes            | Bill and Melinda Gates Foundation, gr                               | private funding               | yes                  | no                               |
| na       | na          | no                              | na           | na             | no         | na                        | no             | na                                                                  | na                            | yes                  | no                               |
