# Supplementary material for: Informing the development of the SUCCEED reporting guideline for studies on the scaling of health interventions: A systematic review
Source: PubMed Central journal article supplement (PMC10869056; doi:10.1097/md.0000000000037079), 2024-02-16
Supplement: medi-103-e37079-s009.pdf [file medi-103-e37079-s009.pdf]

| Items id | study_id | Study title                                                   | author           | Items                                                                                                                         | Description | dimension covered | format    | location          | Title | abstract | introduction | method | results | discussion | other information |
|----------|----------|---------------------------------------------------------------|------------------|-------------------------------------------------------------------------------------------------------------------------------|-------------|-------------------|-----------|-------------------|-------|----------|--------------|--------|---------|------------|-------------------|
| 1        | s1       | Development of a checklist to assess the c                    | Albrecht, Lauren | Detailed description of interventions in publiche                                                                             | na          | na                | list      | Table 1           | no    | yes      | no           | yes    | yes     | no         | no                |
| 2        | s1       | Development of a checklist to assess the c                    | Albrecht, Lauren | Detailed description of interventions in publiche                                                                             | na          | na                | list      | Table 1           | no    | yes      | no           | yes    | yes     | no         | no                |
| 3        | s1       | Development of a checklist to assess the c                    | Albrecht, Lauren | Detailed description of interventions in publiche                                                                             | na          | na                | list      | Table 1           | yes   | yes      | yes          | yes    | yes     | no         | no                |
| 4        | s1       | Development of a checklist to assess the c                    | Albrecht, Lauren | Detailed description of interventions in publiche                                                                             | na          | na                | list      | Table 1           | no    | yes      | no           | yes    | no      | no         | no                |
| 5        | s1       | Development of a checklist to assess the c                    | Albrecht, Lauren | Detailed description of interventions in publiche                                                                             | na          | na                | list      | Table 1           | no    | yes      | no           | yes    | yes     | no         | no                |
| 6        | s1       | Development of a checklist to assess the c                    | Albrecht, Lauren | Detailed description of interventions in publiche                                                                             | na          | na                | list      | Table 1           | no    | yes      | no           | yes    | yes     | no         | no                |
| 7        | s1       | Development of a checklist to assess the c                    | Albrecht, Lauren | Detailed description of interventions in publiche                                                                             | na          | na                | list      | Table 1           | no    | yes      | no           | yes    | yes     | no         | no                |
| 8        | s1       | Development of a checklist to assess the c                    | Albrecht, Lauren | Detailed description of interventions in publiche                                                                             | na          | na                | list      | Table 1           | yes   | yes      | yes          | no     | yes     | no         | no                |
| 9        | s1       | Development of a checklist to assess the c                    | Albrecht, Lauren | Clarification of assumed change process and desi                                                                              | na          | na                | list      | Table 1           | yes   | yes      | yes          | no     | yes     | no         | no                |
| 10       | s1       | Development of a checklist to assess the c                    | Albrecht, Lauren | Clarification of assumed change process and desi                                                                              | na          | na                | list      | Table 1           | yes   | yes      | yes          | no     | yes     | no         | no                |
| 11       | s1       | Development of a checklist to assess the c                    | Albrecht, Lauren | Clarification of assumed change process and desi                                                                              | na          | na                | list      | Table 1           | yes   | yes      | yes          | yes    | yes     | yes        | no                |
| 12       | s1       | Development of a checklist to assess the c                    | Albrecht, Lauren | Access to intervention manuals/protocols: na                                                                                  | na          | na                | list      | Table 1           | no    | no       | yes          | yes    | no      | no         | no                |
| 13       | s1       | Development of a checklist to assess the c                    | Albrecht, Lauren | Detailed description of active control conditions: na                                                                         | na          | na                | list      | Table 1           | no    | yes      | no           | yes    | yes     | no         | no                |
| 14       | s1       | Development of a checklist to assess the c                    | Albrecht, Lauren | Detailed description of active control conditions: na                                                                         | na          | na                | list      | Table 1           | no    | yes      | no           | yes    | yes     | no         | no                |
| 15       | s1       | Development of a checklist to assess the c                    | Albrecht, Lauren | Detailed description of active control conditions: na                                                                         | na          | na                | list      | Table 1           | yes   | yes      | yes          | yes    | yes     | yes        | no                |
| 16       | s1       | Development of a checklist to assess the c                    | Albrecht, Lauren | Detailed description of active control conditions: na                                                                         | na          | na                | list      | Table 1           | yes   | yes      | yes          | yes    | yes     | yes        | no                |
| 17       | s1       | Development of a checklist to assess the c                    | Albrecht, Lauren | Detailed description of active control conditions: na                                                                         | na          | na                | list      | Table 1           | no    | no       | yes          | yes    | yes     | yes        | no                |
| 18       | s1       | Development of a checklist to assess the c                    | Albrecht, Lauren | Detailed description of active control conditions: na                                                                         | na          | na                | list      | Table 1           | yes   | yes      | yes          | yes    | yes     | yes        | no                |
| 19       | s1       | Development of a checklist to assess the c                    | Albrecht, Lauren | Detailed description of active control conditions: na                                                                         | na          | na                | list      | Table 1           | no    | no       | no           | yes    | yes     | yes        | no                |
| 20       | s1       | Development of a checklist to assess the c                    | Albrecht, Lauren | Detailed description of active control conditions: na                                                                         | na          | na                | list      | Table 1           | yes   | yes      | yes          | yes    | yes     | yes        | no                |
| 21       | s2       | Evaluating the public health impact of hez Glasgow, Russell E |                  | Reach:Exclusion Criteria % excluded or characteristics                                                                        | na          | na                | list      | Checklist website | no    | no       | no           | yes    | no      | no         | no                |
| 22       | s2       | Evaluating the public health impact of hez Glasgow, Russell E |                  | Reach:Percent individuals who participate, based on t                                                                         | na          | na                | list      | Checklist website | no    | no       | no           | yes    | yes     | no         | no                |
| 23       | s2       | Evaluating the public health impact of hez Glasgow, Russell E |                  | Reach:Characteristics of participants compared t                                                                              | na          | na                | list      | Checklist website | no    | no       | no           | no     | no      | no         | no                |
| 24       | s2       | Evaluating the public health impact of hez Glasgow, Russell E |                  | Reach:Use of qualitative methods to understand na                                                                             | na          | na                | list      | Checklist website | no    | yes      | no           | yes    | no      | no         | no                |
| 25       | s2       | Evaluating the public health impact of hez Glasgow, Russell E |                  | Effectiveness: Measure of primary outcome with e.g. HP 2020 goals, exercise 30 min/                                           | na          | na                | list      | Checklist website | no    | yes      | no           | yes    | yes     | no         | no                |
| 26       | s2       | Evaluating the public health impact of hez Glasgow, Russell E |                  | Effectiveness: Measure of broader outcomes e.g., other outcomes, measure of Q                                                 | na          | na                | list      | Checklist website | no    | no       | no           | yes    | yes     | no         | no                |
| 27       | s2       | Evaluating the public health impact of hez Glasgow, Russell E |                  | Effectiveness: Measure of robustness across subg e.g. moderation analyses                                                     | na          | na                | list      | Checklist website | no    | no       | no           | yes    | yes     | no         | no                |
| 28       | s2       | Evaluating the public health impact of hez Glasgow, Russell E |                  | Effectiveness: Measure of short-term attrition (% %) and differential rates by patient                                        | na          | na                | list      | Checklist website | no    | no       | no           | yes    | yes     | no         | no                |
| 29       | s2       | Evaluating the public health impact of hez Glasgow, Russell E |                  | Effectiveness: Use of qualitative methods/data tc na                                                                          | na          | na                | list      | Checklist website | no    | no       | no           | yes    | no      | no         | no                |
| 30       | s2       | Evaluating the public health impact of hez Glasgow, Russell E |                  | Adoption – Setting LevelPercent Exclusions % or reasons                                                                       | na          | na                | list      | Checklist website | no    | no       | no           | no     | no      | no         | no                |
| 31       | s2       | Evaluating the public health impact of hez Glasgow, Russell E |                  | Adoption – Setting LevelPercent of settings appr valid denominator                                                            | na          | na                | list      | Checklist website | no    | no       | no           | no     | no      | no         | no                |
| 32       | s2       | Evaluating the public health impact of hez Glasgow, Russell E |                  | Adoption – Setting LevelCharacteristics of setting na                                                                         | na          | na                | list      | Checklist website | no    | no       | no           | yes    | yes     | no         | no                |
| 33       | s2       | Evaluating the public health impact of hez Glasgow, Russell E |                  | Adoption – Setting LevelUse of qualitative metho na                                                                           | na          | na                | list      | Checklist website | no    | no       | no           | yes    | no      | no         | no                |
| 34       | s2       | Evaluating the public health impact of hez Glasgow, Russell E |                  | Adoption – Staff LevelStaff Exclusions % or reasons                                                                           | na          | na                | list      | Checklist website | no    | no       | no           | yes    | yes     | no         | no                |
| 35       | s2       | Evaluating the public health impact of hez Glasgow, Russell E |                  | Adoption – Staff LevelPercent of staff invited that na                                                                        | na          | na                | list      | Checklist website | no    | no       | no           | yes    | yes     | no         | no                |
| 36       | s2       | Evaluating the public health impact of hez Glasgow, Russell E |                  | Adoption – Staff LevelCharacteristics of staff part na                                                                        | na          | na                | list      | Checklist website | no    | no       | no           | yes    | yes     | no         | no                |
| 37       | s2       | Evaluating the public health impact of hez Glasgow, Russell E |                  | Adoption – Staff LevelUse of qualitative methods na                                                                           | na          | na                | list      | Checklist website | no    | no       | no           | no     | no      | no         | no                |
| 38       | s2       | Evaluating the public health impact of hez Glasgow, Russell E |                  | ImplementationPercent of perfect delivery or cal e.g., adherence or consistency)                                              | na          | na                | list      | Checklist website | no    | no       | no           | yes    | yes     | no         | no                |
| 39       | s2       | Evaluating the public health impact of hez Glasgow, Russell E |                  | ImplementationAdaptations made to interventio na                                                                              | na          | na                | list      | Checklist website | no    | no       | no           | yes    | yes     | yes        | no                |
| 40       | s2       | Evaluating the public health impact of hez Glasgow, Russell E |                  | ImplementationCost of intervention time or money                                                                              | na          | na                | list      | Checklist website | no    | no       | no           | yes    | yes     | no         | no                |
| 41       | s2       | Evaluating the public health impact of hez Glasgow, Russell E |                  | ImplementationConsistency of implementation a not about differential outcomes, bu                                             | na          | na                | list      | Checklist website | no    | no       | no           | yes    | yes     | no         | no                |
| 42       | s2       | Evaluating the public health impact of hez Glasgow, Russell E |                  | ImplementationUse of qualitative methods to un na                                                                             | na          | na                | list      | Checklist website | no    | no       | no           | yes    | no      | no         | no                |
| 43       | s2       | Evaluating the public health impact of hez Glasgow, Russell E |                  | Maintenance – Individual LevelMeasure of prima with or w/o comparison to a public                                             | na          | na                | list      | Checklist website | no    | yes      | no           | yes    | no      | no         | no                |
| 44       | s2       | Evaluating the public health impact of hez Glasgow, Russell E |                  | Maintenance – Individual LevelMeasure of broad e.g., measure of QoL or potential ne                                           | na          | na                | list      | Checklist website | no    | no       | no           | yes    | no      | no         | no                |
| 45       | s2       | Evaluating the public health impact of hez Glasgow, Russell E |                  | Maintenance – Individual LevelRobustness data - na                                                                            | na          | na                | list      | Checklist website | no    | no       | no           | yes    | yes     | no         | no                |
| 46       | s2       | Evaluating the public health impact of hez Glasgow, Russell E |                  | Maintenance – Individual LevelMeasure of long-t na                                                                            | na          | na                | list      | Checklist website | no    | no       | no           | yes    | yes     | no         | no                |
| 47       | s2       | Evaluating the public health impact of hez Glasgow, Russell E |                  | Maintenance – Individual LevelUse of qualitative na                                                                           | na          | na                | list      | Checklist website | no    | no       | no           | yes    | no      | no         | no                |
| 48       | s2       | Evaluating the public health impact of hez Glasgow, Russell E |                  | Maintenance- Setting LevelIf program is still ongc na                                                                         | na          | na                | list      | Checklist website | no    | no       | no           | yes    | yes     | no         | no                |
| 49       | s2       | Evaluating the public health impact of hez Glasgow, Russell E |                  | Maintenance- Setting LevelIf and how program w which elements retained AFTER pro                                              | na          | na                | list      | Checklist website | no    | no       | no           | yes    | no      | no         | no                |
| 50       | s2       | Evaluating the public health impact of hez Glasgow, Russell E |                  | Maintenance- Setting LevelSome measure/discus na                                                                              | na          | na                | list      | Checklist website | no    | no       | no           | yes    | no      | yes        | no                |
| 51       | s2       | Evaluating the public health impact of hez Glasgow, Russell E |                  | Maintenance- Setting LevelUse of qualitative met na                                                                           | na          | na                | list      | Checklist website | no    | no       | no           | yes    | no      | no         | no                |
| 52       | s3       | A framework for scaling up health intervei                    | Barker, PM       | Setup This phase establishes an entry poir preparing for scaling up                                                           | na          | na                | Narrative | Page 5            | no    | no       | no           | yes    | no      | no         | no                |
| 53       | s3       | A framework for scaling up health intervei                    | Barker, PM       | Develop the scalable unit This phase develops the "scalable u preparing for scaling up                                        | na          | na                | Narrative | Page 5            | no    | no       | no           | yes    | no      | no         | no                |
| 54       | s3       | A framework for scaling up health intervei                    | Barker, PM       | Test of scale-up (i.e., testing the set of interventions)to be underlying theory of change an Assessment of scalability of th | na          | na                | Narrative | Page 6            | no    | no       | no           | yes    | no      | no         | no                |
| 55       | s3       | A framework for scaling up health intervei                    | Barker, PM       | Go to full scale This is a rapid deployment phase in Implementation of the stratej                                            | na          | na                | Narrative | Page 6            | no    | no       | no           | no     | no      | no         | no                |
| 56       | s4       | Protecting the power of interventions thr                     | Vicki S          | Theory: Why was a particular intervention (or set Explicitly identify the theory• Link th                                     | na          | na                | list      | Table 1           | no    | yes      | yes          | yes    | no      | no         | no                |
| 57       | s4       | Protecting the power of interventions thr                     | Vicki S          | Intervention Recipient: Who received the interve Differentiate between the interventio                                        | na          | na                | list      | Table 1           | yes   | yes      | no           | yes    | no      | no         | no                |
| 58       | s4       | Protecting the power of interventions thr                     | Vicki S          | Interventionist: Who delivered the intervention t Identify the interventionist and any                                        | na          | na                | list      | Table 1           | no    | yes      | no           | yes    | no      | no         | no                |
| 59       | s4       | Protecting the power of interventions thr                     | Vicki S          | Intervention Content: What does the interventio Provide clear operational descriptio                                          | na          | na                | list      | Table 1           | no    | yes      | no           | yes    | no      | no         | no                |
| 60       | s4       | Protecting the power of interventions thr                     | Vicki S          | Intervention Delivery: How was the interventio Describe the delivery mode• Describe                                           | na          | na                | list      | Table 1           | no    | yes      | no           | yes    | no      | no         | no                |
| 61       | s5       | Improving the reporting quality of nonran                     | Des Jarlais      | Title and abstract : Information on how units wer na                                                                          | na          | na                | list      | Table 1           | yes   | yes      | no           | no     | no      | no         | no                |
| 62       | s5       | Improving the reporting quality of nonran                     | Des Jarlais      | Title and abstract : Structured abstract recommen na                                                                          | na          | na                | list      | Table 1           | yes   | yes      | no           | no     | no      | no         | no                |
| 63       | s5       | Improving the reporting quality of nonran                     | Des Jarlais      | Title and abstract : Information on target populat na                                                                         | na          | na                | list      | Table 1           | yes   | yes      | no           | no     | no      | no         | no                |
| 64       | s5       | Improving the reporting quality of nonran                     | Des Jarlais      | Background : Scientific background and explanati na                                                                           | na          | na                | list      | Table 1           | no    | no       | yes          | no     | no      | no         | no                |
| 65       | s5       | Improving the reporting quality of nonran                     | Des Jarlais      | Background : Theories used in designing behavio na                                                                            | na          | na                | list      | Table 1           | no    | no       | yes          | no     | no      | no         | no                |
| 66       | s5       | Improving the reporting quality of nonran                     | Des Jarlais      | Participants : Eligibility criteria for participants, in na                                                                   | na          | na                | list      | Table 1           | no    | no       | no           | yes    | no      | no         | no                |
| 67       | s5       | Improving the reporting quality of nonran                     | Des Jarlais      | Participants : Method of recruitment (e.g., referri na                                                                        | na          | na                | list      | Table 1           | no    | no       | no           | yes    | no      | no         | no                |

|     |    |                                                        |                                                       |                                       |    |      |         |     |     |     |     |     |     |     |    |
|-----|----|--------------------------------------------------------|-------------------------------------------------------|---------------------------------------|----|------|---------|-----|-----|-----|-----|-----|-----|-----|----|
| 68  | s5 | Improving the reporting quality of nonran Des Jarlais  | Participants : Recruitment setting                    | na                                    | na | list | Table 1 | no  | no  | no  | yes | no  | no  | no  |    |
| 69  | s5 | Improving the reporting quality of nonran Des Jarlais  | Participants : Settings and locations where the de    | na                                    | na | list | Table 1 | no  | no  | no  | yes | no  | no  | no  |    |
| 70  | s5 | Improving the reporting quality of nonran Des Jarlais  | Interventions : Details of the interventions intenc   | na                                    | na | list | Table 1 | no  | no  | no  | yes | no  | no  | no  |    |
| 71  | s5 | Improving the reporting quality of nonran Des Jarlais  | Interventions : Details of the interventions intenc   | na                                    | na | list | Table 1 | no  | no  | no  | yes | no  | no  | no  |    |
| 72  | s5 | Improving the reporting quality of nonran Des Jarlais  | Interventions : Details of the interventions intenc   | na                                    | na | list | Table 1 | no  | no  | no  | yes | no  | no  | no  |    |
| 73  | s5 | Improving the reporting quality of nonran Des Jarlais  | Interventions : Details of the interventions intenc   | na                                    | na | list | Table 1 | no  | no  | no  | yes | no  | no  | no  |    |
| 74  | s5 | Improving the reporting quality of nonran Des Jarlais  | Interventions : Details of the interventions intenc   | na                                    | na | list | Table 1 | no  | no  | no  | yes | no  | no  | no  |    |
| 75  | s5 | Improving the reporting quality of nonran Des Jarlais  | Interventions : Details of the interventions intenc   | na                                    | na | list | Table 1 | no  | no  | no  | yes | no  | no  | no  |    |
| 76  | s5 | Improving the reporting quality of nonran Des Jarlais  | Interventions : Details of the interventions intenc   | na                                    | na | list | Table 1 | no  | no  | no  | yes | no  | no  | no  |    |
| 77  | s5 | Improving the reporting quality of nonran Des Jarlais  | Interventions : Details of the interventions intenc   | na                                    | na | list | Table 1 | no  | no  | no  | yes | no  | no  | no  |    |
| 78  | s5 | Improving the reporting quality of nonran Des Jarlais  | Objectives : Specific objectives and hypotheses       | na                                    | na | list | Table 1 | no  | no  | no  | yes | no  | no  | no  |    |
| 79  | s5 | Improving the reporting quality of nonran Des Jarlais  | Outcomes : Clearly defined primary and secondar       | na                                    | na | list | Table 1 | no  | no  | no  | yes | no  | no  | no  |    |
| 80  | s5 | Improving the reporting quality of nonran Des Jarlais  | Outcomes : Methods used to collect data and an        | na                                    | na | list | Table 1 | no  | no  | no  | yes | no  | no  | no  |    |
| 81  | s5 | Improving the reporting quality of nonran Des Jarlais  | Outcomes : Information on validated instrument: na    | na                                    | na | list | Table 1 | no  | no  | no  | yes | no  | no  | no  |    |
| 82  | s5 | Improving the reporting quality of nonran Des Jarlais  | Sample size : How sample size was determined ar       | na                                    | na | list | Table 1 | no  | no  | no  | yes | no  | no  | no  |    |
| 83  | s5 | Improving the reporting quality of nonran Des Jarlais  | Assignment method : Unit of assignment (the uni       | na                                    | na | list | Table 1 | no  | no  | no  | yes | no  | no  | no  |    |
| 84  | s5 | Improving the reporting quality of nonran Des Jarlais  | Assignment method : Method used to assign unit        | na                                    | na | list | Table 1 | no  | no  | no  | yes | no  | no  | no  |    |
| 85  | s5 | Improving the reporting quality of nonran Des Jarlais  | Assignment method : Inclusion of aspects employ       | na                                    | na | list | Table 1 | no  | no  | no  | yes | no  | no  | no  |    |
| 86  | s5 | Improving the reporting quality of nonran Des Jarlais  | Blinding (masking) : Whether or not participants,     | na                                    | na | list | Table 1 | no  | no  | no  | yes | no  | no  | no  |    |
| 87  | s5 | Improving the reporting quality of nonran Des Jarlais  | Unit of analysis : Description of the smallest unit   | na                                    | na | list | Table 1 | no  | no  | no  | yes | no  | no  | no  |    |
| 88  | s5 | Improving the reporting quality of nonran Des Jarlais  | Unit of analysis : If the unit of analysis differs fr | na                                    | na | list | Table 1 | no  | no  | no  | yes | no  | no  | no  |    |
| 89  | s5 | Improving the reporting quality of nonran Des Jarlais  | Statistical methods : Statistical methods used to     | na                                    | na | list | Table 1 | no  | no  | no  | yes | no  | no  | no  |    |
| 90  | s5 | Improving the reporting quality of nonran Des Jarlais  | Statistical methods : Statistical methods used for    | na                                    | na | list | Table 1 | no  | no  | no  | yes | no  | no  | no  |    |
| 91  | s5 | Improving the reporting quality of nonran Des Jarlais  | Statistical methods : Methods for imputing missi      | na                                    | na | list | Table 1 | no  | no  | no  | yes | no  | no  | no  |    |
| 92  | s5 | Improving the reporting quality of nonran Des Jarlais  | Statistical methods : Statistical software or progr   | na                                    | na | list | Table 1 | no  | no  | no  | yes | yes | no  | no  |    |
| 93  | s5 | Improving the reporting quality of nonran Des Jarlais  | Participant flow : Flow of participants through ea    | na                                    | na | list | Table 1 | no  | no  | no  | no  | yes | no  | no  |    |
| 94  | s5 | Improving the reporting quality of nonran Des Jarlais  | Participant flow : Enrollment: the numbers of par     | na                                    | na | list | Table 1 | no  | no  | no  | no  | yes | no  | no  |    |
| 95  | s5 | Improving the reporting quality of nonran Des Jarlais  | Participant flow : Assignment: the numbers of pa      | na                                    | na | list | Table 1 | no  | no  | no  | no  | yes | no  | no  |    |
| 96  | s5 | Improving the reporting quality of nonran Des Jarlais  | Participant flow : Allocation and intervention exp    | na                                    | na | list | Table 1 | no  | no  | no  | no  | yes | no  | no  |    |
| 97  | s5 | Improving the reporting quality of nonran Des Jarlais  | Participant flow : Follow-up: the number of partic    | na                                    | na | list | Table 1 | no  | no  | no  | no  | yes | no  | no  |    |
| 98  | s5 | Improving the reporting quality of nonran Des Jarlais  | Participant flow : Analysis: the number of partici    | na                                    | na | list | Table 1 | no  | no  | no  | no  | yes | no  | no  |    |
| 99  | s5 | Improving the reporting quality of nonran Des Jarlais  | Participant flow : Description of protocol deviat     | na                                    | na | list | Table 1 | no  | no  | no  | no  | yes | no  | no  |    |
| 100 | s5 | Improving the reporting quality of nonran Des Jarlais  | Recruitment : Dates defining the periods of recru     | na                                    | na | list | Table 1 | no  | no  | no  | no  | yes | no  | no  |    |
| 101 | s5 | Improving the reporting quality of nonran Des Jarlais  | Baseline data : Baseline demographic and clinical     | na                                    | na | list | Table 1 | no  | no  | no  | no  | yes | no  | no  |    |
| 102 | s5 | Improving the reporting quality of nonran Des Jarlais  | Baseline data : Baseline characteristics for each s   | na                                    | na | list | Table 1 | no  | no  | no  | no  | yes | no  | no  |    |
| 103 | s5 | Improving the reporting quality of nonran Des Jarlais  | Baseline data : Baseline comparisons of those los     | na                                    | na | list | Table 1 | no  | no  | no  | no  | yes | no  | no  |    |
| 104 | s5 | Improving the reporting quality of nonran Des Jarlais  | Baseline data : Comparison between study popul        | na                                    | na | list | Table 1 | no  | no  | no  | no  | yes | no  | no  |    |
| 105 | s5 | Improving the reporting quality of nonran Des Jarlais  | Baseline equivalence : Data on study group equiv      | na                                    | na | list | Table 1 | no  | no  | no  | no  | yes | no  | no  |    |
| 106 | s5 | Improving the reporting quality of nonran Des Jarlais  | Numbers analyzed : Number of participants (denc       | na                                    | na | list | Table 1 | no  | no  | no  | no  | yes | no  | no  |    |
| 107 | s5 | Improving the reporting quality of nonran Des Jarlais  | Numbers analyzed : Indication of whether the an       | na                                    | na | list | Table 1 | no  | no  | no  | no  | yes | no  | no  |    |
| 108 | s5 | Improving the reporting quality of nonran Des Jarlais  | Outcomes and estimation : For each primary and        | na                                    | na | list | Table 1 | no  | no  | no  | no  | yes | no  | no  |    |
| 109 | s5 | Improving the reporting quality of nonran Des Jarlais  | Outcomes and estimation : Inclusion of null and r     | na                                    | na | list | Table 1 | no  | no  | no  | no  | yes | no  | no  |    |
| 110 | s5 | Improving the reporting quality of nonran Des Jarlais  | Outcomes and estimation : Inclusion of results fr     | na                                    | na | list | Table 1 | no  | no  | no  | no  | yes | no  | no  |    |
| 111 | s5 | Improving the reporting quality of nonran Des Jarlais  | Ancillary analyses : Summary of other analyses pe     | na                                    | na | list | Table 1 | no  | no  | no  | no  | yes | no  | no  |    |
| 112 | s5 | Improving the reporting quality of nonran Des Jarlais  | Adverse events : Summary of all important adver       | na                                    | na | list | Table 1 | no  | no  | no  | no  | no  | yes | no  |    |
| 113 | s5 | Improving the reporting quality of nonran Des Jarlais  | Discussion Interpretation : Interpretation of the r   | na                                    | na | list | Table 1 | no  | no  | no  | no  | no  | yes | no  |    |
| 114 | s5 | Improving the reporting quality of nonran Des Jarlais  | Discussion Interpretation : Discussion of results t   | na                                    | na | list | Table 1 | no  | no  | no  | no  | no  | yes | no  |    |
| 115 | s5 | Improving the reporting quality of nonran Des Jarlais  | Discussion Interpretation : Discussion of the succ    | na                                    | na | list | Table 1 | no  | no  | no  | no  | no  | yes | no  |    |
| 116 | s5 | Improving the reporting quality of nonran Des Jarlais  | Discussion Interpretation : Discussion of research    | na                                    | na | list | Table 1 | no  | no  | no  | no  | no  | yes | no  |    |
| 117 | s5 | Improving the reporting quality of nonran Des Jarlais  | Generalizability : Generalizability (external valid   | na                                    | na | list | Table 1 | no  | no  | no  | no  | no  | yes | no  |    |
| 118 | s5 | Improving the reporting quality of nonran Des Jarlais  | Overall evidence : General interpretation of the r    | na                                    | na | list | Table 1 | no  | no  | no  | no  | no  | yes | no  |    |
| 140 | s7 | Reviewing evidence on complex social int Egan, M       | Motivation                                            | Does the study describe why the m:    | na | list | Table 2 | no  | yes | yes | no  | no  | yes | no  |    |
| 141 | s7 | Reviewing evidence on complex social int Egan, M       | Theory of change                                      | Was the intervention design influen   | na | list | Table 2 | no  | yes | yes | yes | no  | yes | no  |    |
| 142 | s7 | Reviewing evidence on complex social int Egan, M       | Implementation context                                | Does the study provide any useful c   | na | list | Table 2 | yes | yes | yes | yes | yes | yes | no  |    |
| 143 | s7 | Reviewing evidence on complex social int Egan, M       | Experience                                            | Does the study establish whether t    | na | list | Table 2 | no  | yes | yes | yes | yes | yes | no  |    |
| 144 | s7 | Reviewing evidence on complex social int Egan, M       | Planning consultations                                | Is there a report of consultation/col | na | list | Table 2 | no  | no  | no  | no  | yes | no  | yes | no |
| 145 | s7 | Reviewing evidence on complex social int Egan, M       | Delivery collaborations                               | Is there a report of consultation/col | na | list | Table 2 | no  | no  | no  | no  | yes | no  | yes | no |
| 146 | s7 | Reviewing evidence on complex social int Egan, M       | Manager support                                       | Were on-site managers/supervisors     | na | list | Table 2 | no  | no  | no  | no  | yes | no  | yes | no |
| 147 | s7 | Reviewing evidence on complex social int Egan, M       | Employee support                                      | Were employees supportive of the      | na | list | Table 2 | no  | no  | no  | no  | yes | no  | yes | no |
| 148 | s7 | Reviewing evidence on complex social int Egan, M       | Resources                                             | Does the study give information abx   | na | list | Table 2 | no  | no  | no  | no  | yes | no  | yes | no |
| 149 | s7 | Reviewing evidence on complex social int Egan, M       | Differential effects and population characteristics   | Does the study provide information    | na | list | Table 2 | no  | yes | no  | no  | no  | yes | no  | no |
| 150 | s8 | Reporting guidelines for implementation : Hales, Simon | Title and abstract : Identify as implementation or    | na                                    | na | list | Table 2 | yes | yes | no  | no  | no  | no  | no  | no |
| 151 | s8 | Reporting guidelines for implementation : Hales, Simon | Background : "Explain the scientific background r     | na                                    | na | list | Table 2 | no  | no  | no  | yes | no  | no  | no  | no |
| 152 | s8 | Reporting guidelines for implementation : Hales, Simon | Background : Describe the policy or programme c       | na                                    | na | list | Table 2 | no  | no  | no  | yes | no  | no  | no  | no |
| 153 | s8 | Reporting guidelines for implementation : Hales, Simon | Background : What is it about implementation in       | na                                    | na | list | Table 2 | no  | no  | no  | yes | no  | no  | no  | no |
| 154 | s8 | Reporting guidelines for implementation : Hales, Simon | Problem : "Briefly describe the nature and severi     | na                                    | na | list | Table 2 | no  | no  | no  | yes | no  | no  | no  | no |
| 155 | s8 | Reporting guidelines for implementation : Hales, Simon | Problem : Specify who (champions/supporters) w        | na                                    | na | list | Table 2 | no  | no  | no  | yes | no  | no  | no  | no |
| 156 | s8 | Reporting guidelines for implementation : Hales, Simon | Implementation strategy : Describe mechanisms         | na                                    | na | list | Table 2 | no  | no  | no  | yes | no  | no  | no  | no |
| 157 | s8 | Reporting guidelines for implementation : Hales, Simon | Intervention : What evidence-based intervention       | na                                    | na | list | Table 2 | no  | no  | no  | yes | no  | no  | no  | no |

|     |     |                                                                 |                                                                                                      |    |      |         |     |     |     |     |     |     |     |
|-----|-----|-----------------------------------------------------------------|------------------------------------------------------------------------------------------------------|----|------|---------|-----|-----|-----|-----|-----|-----|-----|
| 158 | S8  | Reporting guidelines for implementation : Hales, Simon          | Intended outcomes : Describe the specific aim of na                                                  | na | list | Table 2 | no  | no  | yes | no  | no  | no  | no  |
| 159 | S8  | Reporting guidelines for implementation : Hales, Simon          | Study design : Identify the study design (for exam na                                                | na | list | Table 2 | no  | no  | no  | yes | no  | no  | no  |
| 160 | S8  | Reporting guidelines for implementation : Hales, Simon          | Setting : Exact details of study locations, baseline na                                              | na | list | Table 2 | no  | no  | no  | yes | no  | no  | no  |
| 161 | S8  | Reporting guidelines for implementation : Hales, Simon          | Implementation : "Give a description of the imple na                                                 | na | list | Table 2 | no  | no  | no  | yes | no  | no  | no  |
| 162 | S8  | Reporting guidelines for implementation : Hales, Simon          | Implementation : Describe the intervention, (if re na                                                | na | list | Table 2 | no  | no  | no  | yes | no  | no  | no  |
| 163 | S8  | Reporting guidelines for implementation : Hales, Simon          | Implementation : Explain methods used to assure na                                                   | na | list | Table 2 | no  | no  | no  | yes | no  | no  | no  |
| 164 | S8  | Reporting guidelines for implementation : Hales, Simon          | Participants : "For qualitative studies: what was t na                                               | na | list | Table 2 | no  | no  | no  | yes | no  | no  | no  |
| 165 | S8  | Reporting guidelines for implementation : Hales, Simon          | Participants : Indicate how size of target populati na                                               | na | list | Table 2 | no  | no  | no  | yes | no  | no  | no  |
| 166 | S8  | Reporting guidelines for implementation : Hales, Simon          | Participants : Cohort study – Give the eligibility cr na                                             | na | list | Table 2 | no  | no  | no  | yes | no  | no  | no  |
| 167 | S8  | Reporting guidelines for implementation : Hales, Simon          | Participants : Case-control study – Give the eligib na                                               | na | list | Table 2 | no  | no  | no  | yes | no  | no  | no  |
| 168 | S8  | Reporting guidelines for implementation : Hales, Simon          | Participants : Cross-sectional study – Give the elij na                                              | na | list | Table 2 | no  | no  | no  | yes | no  | no  | no  |
| 169 | S8  | Reporting guidelines for implementation : Hales, Simon          | Participants : For matched studies, give matching na                                                 | na | list | Table 2 | no  | no  | no  | yes | no  | no  | no  |
| 170 | S8  | Reporting guidelines for implementation : Hales, Simon          | Participants : For randomized studies, how was re na                                                 | na | list | Table 2 | no  | no  | no  | yes | no  | no  | no  |
| 171 | S8  | Reporting guidelines for implementation : Hales, Simon          | Variables : Clearly define all outcomes, exposures na                                                | na | list | Table 2 | no  | no  | no  | yes | no  | no  | no  |
| 172 | S8  | Reporting guidelines for implementation : Hales, Simon          | Data sources/measurement : "For each variable c na                                                   | na | list | Table 2 | no  | no  | no  | yes | no  | no  | no  |
| 173 | S8  | Reporting guidelines for implementation : Hales, Simon          | Data sources/measurement : Methods for proces na                                                     | na | list | Table 2 | no  | no  | no  | yes | no  | no  | no  |
| 174 | S8  | Reporting guidelines for implementation : Hales, Simon          | Data sources/measurement : Explain how variabl na                                                    | na | list | Table 2 | no  | no  | no  | yes | no  | no  | no  |
| 175 | S8  | Reporting guidelines for implementation : Hales, Simon          | Analyses : "Which analyses were pre-specified, ar na                                                 | na | list | Table 2 | no  | no  | no  | yes | no  | no  | no  |
| 176 | S8  | Reporting guidelines for implementation : Hales, Simon          | Analyses : For qualitative analyses: process by wh na                                                | na | list | Table 2 | no  | no  | no  | yes | no  | no  | no  |
| 177 | S8  | Reporting guidelines for implementation : Hales, Simon          | Analyses : For quantitative analyses: describe sta na                                                | na | list | Table 2 | no  | no  | no  | yes | no  | no  | no  |
| 178 | S8  | Reporting guidelines for implementation : Hales, Simon          | Analyses : Where both qualitative and quantitati na                                                  | na | list | Table 2 | no  | no  | no  | yes | no  | no  | no  |
| 179 | S8  | Reporting guidelines for implementation : Hales, Simon          | Analyses : Describe any methods used to examin na                                                    | na | list | Table 2 | no  | no  | no  | yes | no  | no  | no  |
| 180 | S8  | Reporting guidelines for implementation : Hales, Simon          | Analyses : Explain how missing data were address na                                                  | na | list | Table 2 | no  | no  | no  | yes | no  | no  | no  |
| 181 | S8  | Reporting guidelines for implementation : Hales, Simon          | Analyses : Cohort study: explain how loss to follo na                                                | na | list | Table 2 | no  | no  | no  | yes | no  | no  | no  |
| 182 | S8  | Reporting guidelines for implementation : Hales, Simon          | Analyses : Case-control study: describe matching na                                                  | na | list | Table 2 | no  | no  | no  | yes | no  | no  | no  |
| 183 | S8  | Reporting guidelines for implementation : Hales, Simon          | Ethical considerations : "Including consent procer na                                                | na | list | Table 2 | no  | no  | no  | yes | no  | no  | no  |
| 184 | S8  | Reporting guidelines for implementation : Hales, Simon          | Ethical considerations : How was the balance bet na                                                  | na | list | Table 2 | no  | no  | no  | yes | no  | no  | no  |
| 185 | S8  | Reporting guidelines for implementation : Hales, Simon          | Descriptive data : "Report numbers of individuals na                                                 | na | list | Table 2 | no  | no  | no  | no  | yes | no  | no  |
| 186 | S8  | Reporting guidelines for implementation : Hales, Simon          | Descriptive data : Cross tabulate the number of p na                                                 | na | list | Table 2 | no  | no  | no  | no  | yes | no  | no  |
| 187 | S8  | Reporting guidelines for implementation : Hales, Simon          | Outcomes : "Explain the actual course of the inte na                                                 | na | list | Table 2 | no  | no  | no  | no  | yes | no  | no  |
| 188 | S8  | Reporting guidelines for implementation : Hales, Simon          | Outcomes : Document the degree of success in ir na                                                   | na | list | Table 2 | no  | no  | no  | no  | yes | no  | no  |
| 189 | S8  | Reporting guidelines for implementation : Hales, Simon          | Outcomes : Document the degree of success in ir na                                                   | na | list | Table 2 | no  | no  | no  | no  | yes | no  | no  |
| 190 | S8  | Reporting guidelines for implementation : Hales, Simon          | Outcomes : Document the degree of success in ir na                                                   | na | list | Table 2 | no  | no  | no  | no  | yes | no  | no  |
| 191 | S8  | Reporting guidelines for implementation : Hales, Simon          | Outcome data : Report numbers of outcome even na                                                     | na | list | Table 2 | no  | no  | no  | no  | yes | no  | no  |
| 192 | S8  | Reporting guidelines for implementation : Hales, Simon          | Main results : "Main findings (e.g. interpretations na                                               | na | list | Table 2 | no  | no  | no  | no  | yes | no  | no  |
| 193 | S8  | Reporting guidelines for implementation : Hales, Simon          | Main results : Provide unadjusted estimates of in na                                                 | na | list | Table 2 | no  | no  | no  | no  | yes | no  | no  |
| 194 | S8  | Reporting guidelines for implementation : Hales, Simon          | Main results : Consider translating estimates of re na                                               | na | list | Table 2 | no  | no  | no  | no  | yes | no  | no  |
| 195 | S8  | Reporting guidelines for implementation : Hales, Simon          | Main results : Synthesis of quantitative and quali na                                                | na | list | Table 2 | no  | no  | no  | no  | yes | no  | no  |
| 196 | S8  | Reporting guidelines for implementation : Hales, Simon          | Other analyses : Report other analyses done – e.g. na                                                | na | list | Table 2 | no  | no  | no  | no  | yes | no  | no  |
| 197 | S8  | Reporting guidelines for implementation : Hales, Simon          | Key results : Summarize key results with referenc na                                                 | na | list | Table 2 | no  | no  | no  | no  | no  | yes | no  |
| 198 | S8  | Reporting guidelines for implementation : Hales, Simon          | Limitations : "Discuss limitations of the study, tak na                                              | na | list | Table 2 | no  | no  | no  | no  | no  | yes | no  |
| 199 | S8  | Reporting guidelines for implementation : Hales, Simon          | Limitations : Discuss both direction and magnitud na                                                 | na | list | Table 2 | no  | no  | no  | no  | no  | yes | no  |
| 200 | S8  | Reporting guidelines for implementation : Hales, Simon          | Interpretation : "Interpret the results considering na                                               | na | list | Table 2 | no  | no  | no  | no  | no  | yes | no  |
| 201 | S8  | Reporting guidelines for implementation : Hales, Simon          | Interpretation : Compare and contrast study resu na                                                  | na | list | Table 2 | no  | no  | no  | no  | no  | yes | no  |
| 202 | S8  | Reporting guidelines for implementation : Hales, Simon          | Interpretation : Suggest steps that might be mod na                                                  | na | list | Table 2 | no  | no  | no  | no  | no  | yes | no  |
| 203 | S8  | Reporting guidelines for implementation : Hales, Simon          | Interpretation : Review issues of opportunity cost na                                                | na | list | Table 2 | no  | no  | no  | no  | no  | yes | no  |
| 204 | S8  | Reporting guidelines for implementation : Hales, Simon          | Contextual factors : Success factors, barriers and na                                                | na | list | Table 2 | no  | no  | no  | no  | no  | yes | no  |
| 205 | S8  | Reporting guidelines for implementation : Hales, Simon          | Generalizability : "Discuss the generalizability (ex na                                              | na | list | Table 2 | no  | no  | no  | no  | no  | yes | no  |
| 206 | S8  | Reporting guidelines for implementation : Hales, Simon          | Generalizability : Explore factors that could affect na                                              | na | list | Table 2 | no  | no  | no  | no  | no  | yes | no  |
| 207 | S8  | Reporting guidelines for implementation : Hales, Simon          | Generalizability : Applicability to other settings; P na                                             | na | list | Table 2 | no  | no  | no  | no  | no  | yes | no  |
| 208 | S8  | Reporting guidelines for implementation : Hales, Simon          | Conclusion : "Consider overall practical usefulness na                                               | na | list | Table 2 | no  | no  | no  | no  | no  | yes | no  |
| 209 | S8  | Reporting guidelines for implementation : Hales, Simon          | Conclusion : Suggest implications for the implem na                                                  | na | list | Table 2 | no  | no  | no  | no  | no  | yes | no  |
| 210 | S8  | Reporting guidelines for implementation : Hales, Simon          | Conclusion : Suggest implications for further stud na                                                | na | list | Table 2 | no  | no  | no  | no  | no  | yes | no  |
| 211 | S8  | Reporting guidelines for implementation : Hales, Simon          | Other information : "Indicate if the study is regist na                                              | na | list | Table 2 | no  | no  | no  | no  | no  | no  | yes |
| 212 | S8  | Reporting guidelines for implementation : Hales, Simon          | Other information : Give the source of funding ar na                                                 | na | list | Table 2 | no  | no  | no  | no  | no  | no  | yes |
| 213 | S8  | Reporting guidelines for implementation : Hales, Simon          | Other information : State the role of individuals ir na                                              | na | list | Table 2 | no  | no  | no  | no  | no  | no  | yes |
| 214 | S9  | Reporting standards for studies of tailorec Harrington, Nancy G | Title, abstract, keywords : Include some variation na                                                | na | list | Table 1 | yes | yes | no  | no  | no  | no  | yes |
| 215 | S9  | Reporting standards for studies of tailorec Harrington, Nancy G | Variables/constructs : Specify variables/construct na                                                | na | list | Table 1 | no  | no  | no  | yes | no  | no  | no  |
| 216 | S9  | Reporting standards for studies of tailorec Harrington, Nancy G | Theoretical foundation : Describe how theory gui na                                                  | na | list | Table 1 | no  | no  | no  | yes | no  | no  | no  |
| 217 | S9  | Reporting standards for studies of tailorec Harrington, Nancy G | Tailored messages : Describe the type of the tailo na                                                | na | list | Table 1 | no  | no  | no  | yes | no  | no  | no  |
| 218 | S9  | Reporting standards for studies of tailorec Harrington, Nancy G | Tailoring system : Describe the tailoring system a na                                                | na | list | Table 1 | no  | no  | no  | yes | no  | no  | no  |
| 219 | S9  | Reporting standards for studies of tailorec Harrington, Nancy G | Intervention channel, format, dosage and context na                                                  | na | list | Table 1 | no  | no  | no  | yes | no  | no  | no  |
| 220 | S9  | Reporting standards for studies of tailorec Harrington, Nancy G | Intervention implementation and assessment : Describ na                                              | na | list | Table 1 | no  | no  | no  | yes | no  | no  | no  |
| 221 | S10 | Better reporting of interventions: templat Hoffmann, Tammy C    | Brief name: Provide the name or a phrase that de Precision in the name, or brief description, of an  | na | list | Table 1 | no  | no  | no  | yes | no  | no  | no  |
| 222 | S10 | Better reporting of interventions: templat Hoffmann, Tammy C    | Why: Describe any rationale, theory, or goal of th Inclusion of the rationale, theory, or goals that | na | list | Table 1 | no  | no  | no  | yes | no  | no  | no  |
| 223 | S10 | Better reporting of interventions: templat Hoffmann, Tammy C    | What (materials): Describe any physical or inform A full description of an intervention st           | na | list | Table 1 | no  | no  | no  | yes | no  | no  | no  |
| 224 | S10 | Better reporting of interventions: templat Hoffmann, Tammy C    | What (procedures): Describe each of the procedu Describe what processes, activities, or procedures   | na | list | Table 1 | no  | no  | no  | yes | no  | no  | no  |
| 225 | S10 | Better reporting of interventions: templat Hoffmann, Tammy C    | Who provided: For each category of intervention The term "intervention provider" refers to who       | na | list | Table 1 | no  | no  | no  | yes | no  | no  | no  |
| 226 | S10 | Better reporting of interventions: templat Hoffmann, Tammy C    | How: Describe the modes of delivery (such as fac Specify whether the intervention was provided       | na | list | Table 1 | no  | no  | no  | yes | no  | no  | no  |

|     |     |                                                                                                                                                                                    |      |         |    |     |     |     |     |     |     |
|-----|-----|------------------------------------------------------------------------------------------------------------------------------------------------------------------------------------|------|---------|----|-----|-----|-----|-----|-----|-----|
| 227 | S10 | Better reporting of interventions: templat Hoffmann, Tammy C Where: Describe the type(s) of location(s) where In some studies the intervention can be delivered                    | list | Table 1 | no | no  | no  | yes | no  | no  | no  |
| 228 | S10 | Better reporting of interventions: templat Hoffmann, Tammy C When and how much: Describe the number of tir The type of information needed about the "when                          | list | Table 1 | no | no  | no  | yes | no  | no  | no  |
| 229 | S10 | Better reporting of interventions: templat Hoffmann, Tammy C Tailoring: If the intervention was planned to be personalized, interventions, not all participants                    | list | Table 1 | no | no  | no  | yes | no  | no  | no  |
| 230 | S10 | Better reporting of interventions: templat Hoffmann, Tammy C Modifications: If the intervention was modified d This item refers to modifications that occurred at                  | list | Table 1 | no | no  | no  | yes | no  | no  | no  |
| 231 | S10 | Better reporting of interventions: templat Hoffmann, Tammy C How well (planned): If intervention adherence or Fidelity refers to the degree to which na                            | list | Table 1 | no | no  | no  | yes | no  | no  | no  |
| 232 | S10 | Better reporting of interventions: templat Hoffmann, Tammy C How well (actual): If intervention adherence or fi For various reasons, an intervention was not delivered in parts of | list | Table 1 | no | no  | no  | yes | no  | no  | no  |
| 233 | S11 | Reporting on innovative public health inte Huston, Patricia Has the author clearly identified the issue that pr na                                                                 | list | Table 1 | no | no  | yes | no  | no  | no  | no  |
| 234 | S11 | Reporting on innovative public health inte Huston, Patricia Is this issue pertinent to public health? na                                                                           | list | Table 1 | no | no  | yes | no  | no  | no  | no  |
| 235 | S11 | Reporting on innovative public health inte Huston, Patricia Has the appropriate literature been na                                                                                 | list | Table 1 | no | no  | yes | no  | no  | no  | no  |
| 236 | S11 | Reporting on innovative public health inte Huston, Patricia Are the objectives of the intervention cle na                                                                          | list | Table 1 | no | no  | yes | no  | no  | no  | no  |
| 237 | S11 | Reporting on innovative public health inte Huston, Patricia Target Population : Is the target population clear na                                                                  | list | Table 1 | no | no  | no  | yes | no  | no  | no  |
| 238 | S11 | Reporting on innovative public health inte Huston, Patricia Target Population : Is the method used to reach t na                                                                   | list | Table 1 | no | no  | no  | yes | no  | no  | no  |
| 239 | S11 | Reporting on innovative public health inte Huston, Patricia setting : Is the context of the study clear? na                                                                        | list | Table 1 | no | no  | no  | yes | no  | no  | no  |
| 240 | S11 | Reporting on innovative public health inte Huston, Patricia Public Health Intervention : Is the intervention cl na                                                                 | list | Table 1 | no | no  | no  | yes | no  | no  | no  |
| 241 | S11 | Reporting on innovative public health inte Huston, Patricia Public Health Intervention : Is the preliminary evc na                                                                 | list | Table 1 | no | no  | no  | yes | no  | no  | no  |
| 242 | S11 | Reporting on innovative public health inte Huston, Patricia Public Health Intervention : Were meaningful out na                                                                    | list | Table 1 | no | no  | no  | yes | no  | no  | no  |
| 243 | S11 | Reporting on innovative public health inte Huston, Patricia Is a descriptive profile of participants given? na                                                                     | list | Table 1 | no | no  | no  | no  | yes | no  | no  |
| 244 | S11 | Reporting on innovative public health inte Huston, Patricia Is the level of participation noted na                                                                                 | list | Table 1 | no | no  | no  | no  | yes | no  | no  |
| 245 | S11 | Reporting on innovative public health inte Huston, Patricia Are the successes and challenges of delivering th na                                                                   | list | Table 1 | no | no  | no  | no  | yes | no  | no  |
| 246 | S11 | Reporting on innovative public health inte Huston, Patricia Are the outcomes appropriately described na                                                                            | list | Table 1 | no | no  | no  | no  | yes | no  | no  |
| 247 | S11 | Reporting on innovative public health inte Huston, Patricia Are the major findings highlighted na                                                                                  | list | Table 1 | no | no  | no  | no  | yes | no  | no  |
| 248 | S11 | Reporting on innovative public health inte Huston, Patricia Are findings discussed with reference to existing na                                                                   | list | Table 1 | no | no  | no  | no  | no  | yes | no  |
| 249 | S11 | Reporting on innovative public health inte Huston, Patricia Have strengths and weaknesses been considered na                                                                       | list | Table 1 | no | no  | no  | no  | no  | yes | no  |
| 250 | S11 | Reporting on innovative public health inte Huston, Patricia Are the lessons learned from the intervention dis na                                                                   | list | Table 1 | no | no  | no  | no  | no  | yes | no  |
| 251 | S11 | Reporting on innovative public health inte Huston, Patricia Are the implications for future initiatives explore na                                                                 | list | Table 1 | no | no  | no  | no  | no  | yes | no  |
| 252 | S12 | Programme Reporting Standards (PRS) for Kågesten, Anna E Programme Overview : Rationale and objectives : na                                                                        | list | Table 5 | no | yes | yes | no  | no  | no  | no  |
| 253 | S12 | Programme Reporting Standards (PRS) for Kågesten, Anna E Programme Overview : Rationale and objectives : na                                                                        | list | Table 5 | no | yes | yes | no  | no  | no  | no  |
| 254 | S12 | Programme Reporting Standards (PRS) for Kågesten, Anna E Programme Overview : Rationale and objectives : na                                                                        | list | Table 5 | no | yes | yes | no  | no  | no  | no  |
| 255 | S12 | Programme Reporting Standards (PRS) for Kågesten, Anna E Programme Overview : Start and end date : "Plan na                                                                        | list | Table 5 | no | yes | no  | yes | no  | no  | no  |
| 256 | S12 | Programme Reporting Standards (PRS) for Kågesten, Anna E Programme Overview : Start and end date : b. De na                                                                        | list | Table 5 | no | yes | no  | yes | no  | no  | no  |
| 257 | S12 | Programme Reporting Standards (PRS) for Kågesten, Anna E Programme Overview : Setting and Context : "W/ na                                                                         | list | Table 5 | no | yes | no  | yes | no  | no  | no  |
| 258 | S12 | Programme Reporting Standards (PRS) for Kågesten, Anna E Programme Overview : Setting and Context : b. O na                                                                        | list | Table 5 | no | yes | no  | yes | no  | no  | no  |
| 259 | S12 | Programme Reporting Standards (PRS) for Kågesten, Anna E Programme Overview : Stakeholders : "a. Program na                                                                        | list | Table 5 | no | yes | no  | yes | no  | no  | no  |
| 260 | S12 | Programme Reporting Standards (PRS) for Kågesten, Anna E Programme Overview : Stakeholders : b. Impleme na                                                                         | list | Table 5 | no | yes | no  | yes | no  | no  | no  |
| 261 | S12 | Programme Reporting Standards (PRS) for Kågesten, Anna E Programme Overview : Stakeholders : c. Partners na                                                                        | list | Table 5 | no | yes | no  | yes | no  | no  | no  |
| 262 | S12 | Programme Reporting Standards (PRS) for Kågesten, Anna E Programme Overview : Stakeholders : d. How the na                                                                         | list | Table 5 | no | yes | no  | yes | no  | no  | no  |
| 263 | S12 | Programme Reporting Standards (PRS) for Kågesten, Anna E Programme Overview : Funding source(s) : Name na                                                                          | list | Table 5 | no | yes | no  | no  | no  | no  | yes |
| 264 | S12 | Programme Reporting Standards (PRS) for Kågesten, Anna E Programme Overview : Theory of change and/or na                                                                           | list | Table 5 | no | yes | no  | yes | no  | no  | no  |
| 265 | S12 | Programme Reporting Standards (PRS) for Kågesten, Anna E Programme Overview : Human rights perspective na                                                                          | list | Table 5 | no | yes | no  | yes | no  | no  | no  |
| 266 | S12 | Programme Reporting Standards (PRS) for Kågesten, Anna E Programme Overview : Human rights perspective na                                                                          | list | Table 5 | no | no  | no  | yes | no  | no  | no  |
| 267 | S12 | Programme Reporting Standards (PRS) for Kågesten, Anna E Programme Components and Implementation : P na                                                                            | list | Table 5 | no | no  | no  | yes | no  | no  | no  |
| 268 | S12 | Programme Reporting Standards (PRS) for Kågesten, Anna E Programme Components and Implementation : P na                                                                            | list | Table 5 | no | no  | no  | yes | no  | no  | no  |
| 269 | S12 | Programme Reporting Standards (PRS) for Kågesten, Anna E Programme Components and Implementation : C na                                                                            | list | Table 5 | no | no  | no  | yes | no  | no  | no  |
| 270 | S12 | Programme Reporting Standards (PRS) for Kågesten, Anna E Programme Components and Implementation : C na                                                                            | list | Table 5 | no | no  | no  | yes | no  | no  | no  |
| 271 | S12 | Programme Reporting Standards (PRS) for Kågesten, Anna E Programme Components and Implementation : C na                                                                            | list | Table 5 | no | no  | no  | yes | no  | no  | no  |
| 272 | S12 | Programme Reporting Standards (PRS) for Kågesten, Anna E Programme Components and Implementation : C na                                                                            | list | Table 5 | no | no  | no  | yes | no  | no  | no  |
| 273 | S12 | Programme Reporting Standards (PRS) for Kågesten, Anna E Programme Components and Implementation : C na                                                                            | list | Table 5 | no | no  | no  | yes | no  | no  | no  |
| 274 | S12 | Programme Reporting Standards (PRS) for Kågesten, Anna E Programme Components and Implementation : C na                                                                            | list | Table 5 | no | no  | no  | yes | no  | no  | no  |
| 275 | S12 | Programme Reporting Standards (PRS) for Kågesten, Anna E Programme Components and Implementation : C na                                                                            | list | Table 5 | no | no  | no  | yes | no  | no  | no  |
| 276 | S12 | Programme Reporting Standards (PRS) for Kågesten, Anna E Programme Components and Implementation : C na                                                                            | list | Table 5 | no | no  | no  | yes | no  | no  | no  |
| 277 | S12 | Programme Reporting Standards (PRS) for Kågesten, Anna E Monitoring of Implementation : Monitoring mecl na                                                                         | list | Table 5 | no | no  | no  | yes | no  | no  | no  |
| 278 | S12 | Programme Reporting Standards (PRS) for Kågesten, Anna E Monitoring of Implementation : Coverage/Reach na                                                                          | list | Table 5 | no | no  | no  | yes | no  | no  | no  |
| 279 | S12 | Programme Reporting Standards (PRS) for Kågesten, Anna E Monitoring of Implementation : Coverage/Reach na                                                                          | list | Table 5 | no | no  | no  | yes | no  | no  | no  |
| 280 | S12 | Programme Reporting Standards (PRS) for Kågesten, Anna E Monitoring of Implementation : Coverage/Reach na                                                                          | list | Table 5 | no | no  | no  | yes | no  | no  | no  |
| 281 | S12 | Programme Reporting Standards (PRS) for Kågesten, Anna E Monitoring of Implementation : Adaptations : "W na                                                                        | list | Table 5 | no | no  | no  | yes | no  | no  | no  |
| 282 | S12 | Programme Reporting Standards (PRS) for Kågesten, Anna E Monitoring of Implementation : Adaptations : b. I na                                                                      | list | Table 5 | no | no  | no  | yes | no  | no  | no  |
| 283 | S12 | Programme Reporting Standards (PRS) for Kågesten, Anna E Monitoring of Implementation : Acceptability : "F na                                                                      | list | Table 5 | no | no  | no  | yes | no  | no  | no  |
| 284 | S12 | Programme Reporting Standards (PRS) for Kågesten, Anna E Monitoring of Implementation : Feasibility : "Ass na                                                                      | list | Table 5 | no | no  | no  | yes | no  | no  | no  |
| 285 | S12 | Programme Reporting Standards (PRS) for Kågesten, Anna E Monitoring of Implementation : Factors affecting na                                                                       | list | Table 5 | no | no  | no  | yes | no  | no  | no  |
| 286 | S12 | Programme Reporting Standards (PRS) for Kågesten, Anna E Evaluation and Results : Evaluation : "a. Type of na                                                                      | list | Table 5 | no | no  | no  | yes | no  | no  | no  |
| 287 | S12 | Programme Reporting Standards (PRS) for Kågesten, Anna E Evaluation and Results : Evaluation : b. Evaluator na                                                                     | list | Table 5 | no | no  | no  | yes | no  | no  | no  |
| 288 | S12 | Programme Reporting Standards (PRS) for Kågesten, Anna E Evaluation and Results : Results : "Description of na                                                                     | list | Table 5 | no | no  | no  | no  | yes | no  | no  |
| 289 | S12 | Programme Reporting Standards (PRS) for Kågesten, Anna E Evaluation and Results : Results : b. Whether the na                                                                      | list | Table 5 | no | no  | no  | no  | yes | no  | no  |
| 290 | S12 | Programme Reporting Standards (PRS) for Kågesten, Anna E Evaluation and Results : Results : c. Whether the na                                                                      | list | Table 5 | no | no  | no  | no  | yes | no  | no  |
| 291 | S12 | Programme Reporting Standards (PRS) for Kågesten, Anna E Evaluation and Results : Costs : "Summary of the na                                                                       | list | Table 5 | no | no  | no  | no  | yes | no  | no  |
| 292 | S12 | Programme Reporting Standards (PRS) for Kågesten, Anna E Evaluation and Results : Costs : b. If and how a co na                                                                    | list | Table 5 | no | no  | no  | no  | yes | no  | no  |
| 293 | S12 | Programme Reporting Standards (PRS) for Kågesten, Anna E Synthesis : Lessons learnt : "Appraised weakness na                                                                       | list | Table 5 | no | no  | no  | no  | no  | yes | no  |
| 294 | S12 | Programme Reporting Standards (PRS) for Kågesten, Anna E Synthesis : Sustainability : "Reflections on the sus na                                                                   | list | Table 5 | no | no  | no  | no  | no  | yes | no  |
| 295 | S12 | Programme Reporting Standards (PRS) for Kågesten, Anna E Synthesis : Scalability : "Description of the scale- na                                                                   | list | Table 5 | no | no  | no  | no  | no  | yes | no  |

|     |     |                                                           |                                                         |                                                                                               |      |         |     |     |     |     |     |     |    |
|-----|-----|-----------------------------------------------------------|---------------------------------------------------------|-----------------------------------------------------------------------------------------------|------|---------|-----|-----|-----|-----|-----|-----|----|
| 296 | S12 | Programme Reporting Standards (PRS) for Kågesten, Anna E  | Synthesis : Possibilities for implementation in oth na  | na                                                                                            | list | Table 5 | no  | no  | no  | no  | no  | yes | no |
| 297 | S12 | Programme Reporting Standards (PRS) for Kågesten, Anna E  | Synthesis : Additional information (optional) : "Re na  | na                                                                                            | list | Table 5 | no  | no  | no  | no  | no  | yes | no |
| 298 | S12 | Programme Reporting Standards (PRS) for Kågesten, Anna E  | Synthesis : Additional information (optional) : Am na   | na                                                                                            | list | Table 5 | no  | no  | no  | no  | no  | yes | no |
| 299 | S13 | Reporting of context and implementation Luoto Jill        | Intervention characteristics: Intervention/Program      | na                                                                                            | list | Table 1 | no  | no  | no  | yes | no  | no  | no |
| 300 | S13 | Reporting of context and implementation Luoto Jill        | Intervention characteristics: A description of why na   | na                                                                                            | list | Table 1 | no  | no  | no  | yes | no  | no  | no |
| 301 | S13 | Reporting of context and implementation Luoto Jill        | Intervention characteristics: Rationale for the aim na  | na                                                                                            | list | Table 1 | no  | no  | no  | yes | no  | no  | no |
| 302 | S13 | Reporting of context and implementation Luoto Jill        | Intervention Characteristics: Detailed description na   | na                                                                                            | list | Table 1 | no  | no  | no  | yes | no  | no  | no |
| 303 | S13 | Reporting of context and implementation Luoto Jill        | Intervention Characteristics: Detailed description na   | na                                                                                            | list | Table 1 | no  | no  | no  | yes | no  | no  | no |
| 304 | S13 | Reporting of context and implementation Luoto Jill        | Intervention Characteristics: Detailed description na   | na                                                                                            | list | Table 1 | no  | no  | no  | yes | no  | no  | no |
| 305 | S13 | Reporting of context and implementation Luoto Jill        | Intervention Characteristics: Detailed description na   | na                                                                                            | list | Table 1 | no  | no  | no  | yes | no  | no  | no |
| 306 | S13 | Reporting of context and implementation Luoto Jill        | Intervention Characteristics: Detailed description na   | na                                                                                            | list | Table 1 | no  | no  | no  | yes | no  | no  | no |
| 307 | S13 | Reporting of context and implementation Luoto Jill        | Intervention Characteristics: Detailed description na   | na                                                                                            | list | Table 1 | no  | no  | no  | yes | no  | no  | no |
| 308 | S13 | Reporting of context and implementation Luoto Jill        | Intervention Characteristics: Detailed description na   | na                                                                                            | list | Table 1 | no  | no  | no  | yes | no  | no  | no |
| 309 | S13 | Reporting of context and implementation Luoto Jill        | Intervention Characteristics: Detailed description na   | na                                                                                            | list | Table 1 | no  | no  | no  | yes | no  | no  | no |
| 310 | S13 | Reporting of context and implementation Luoto Jill        | Intervention Characteristics: Costs of the interver na  | na                                                                                            | list | Table 1 | no  | no  | no  | yes | no  | no  | no |
| 311 | S13 | Reporting of context and implementation Luoto Jill        | Outer Setting: External policies and incentives na      | na                                                                                            | list | Table 1 | no  | no  | no  | yes | no  | no  | no |
| 312 | S13 | Reporting of context and implementation Luoto Jill        | Population needs                                        | na                                                                                            | list | Table 1 | no  | no  | no  | yes | no  | no  | no |
| 313 | S13 | Reporting of context and implementation Luoto Jill        | Process of implementation: Description of facilitat na  | na                                                                                            | list | Table 1 | no  | no  | no  | yes | no  | no  | no |
| 314 | S13 | Reporting of context and implementation Luoto Jill        | Description of materials: Description of all materi na  | na                                                                                            | list | Table 1 | no  | no  | no  | yes | no  | no  | no |
| 315 | S13 | Reporting of context and implementation Luoto Jill        | Process of Implementation: Description of an ass na     | na                                                                                            | list | Table 1 | no  | no  | no  | yes | no  | no  | no |
| 348 | S15 | A Framework for Enhancing the Value of F Neta Gila        | Goal                                                    | Improvements in population health, i na                                                       | list | fig 1   | no  | no  | no  | Yes | no  | no  | no |
| 349 | S15 | A Framework for Enhancing the Value of F Neta Gila        | Planning : Clinical, health system, or public health    | Cross-Cutting Issues:Multilevel contextab (including history, policy climate, and incentives) | no   | no      | no  | no  | Yes | no  | no  | no  | no |
| 350 | S15 | A Framework for Enhancing the Value of F Neta Gila        | Planning : Clinical, health system, or public health    | Cross-Cutting Issues:Multilevel contextab (including history, policy climate, and incentives) | no   | no      | no  | no  | Yes | no  | no  | no  | no |
| 351 | S15 | A Framework for Enhancing the Value of F Neta Gila        | Planning : Clinical, health system, or public health    | Cross-Cutting Issues:Multilevel contextab (including history, policy climate, and incentives) | no   | no      | no  | no  | Yes | no  | no  | no  | no |
| 352 | S15 | A Framework for Enhancing the Value of F Neta Gila        | Planning : Setting characteristics : Setting character  | Cross-Cutting Issues:Multilevel contextab (including history, policy climate, and incentives) | no   | no      | no  | no  | Yes | no  | no  | no  | no |
| 353 | S15 | A Framework for Enhancing the Value of F Neta Gila        | Planning : Setting characteristics : organizational     | Cross-Cutting Issues:Multilevel contextab (including history, policy climate, and incentives) | no   | no      | no  | no  | Yes | no  | no  | no  | no |
| 354 | S15 | A Framework for Enhancing the Value of F Neta Gila        | Planning : Setting characteristics : climate and cu     | Cross-Cutting Issues:Multilevel contextab (including history, policy climate, and incentives) | no   | no      | no  | no  | Yes | no  | no  | no  | no |
| 355 | S15 | A Framework for Enhancing the Value of F Neta Gila        | Planning : Setting characteristics : capacity and re    | Cross-Cutting Issues:Multilevel contextab (including history, policy climate, and incentives) | no   | no      | no  | no  | Yes | no  | no  | no  | no |
| 356 | S15 | A Framework for Enhancing the Value of F Neta Gila        | Planning : Implementation strategy : Evaluability       | Cross-Cutting Issues:Multilevel contextab (including history, policy climate, and incentives) | no   | no      | no  | no  | Yes | no  | no  | no  | no |
| 357 | S15 | A Framework for Enhancing the Value of F Neta Gila        | Planning : Implementation strategy : Scalability        | Cross-Cutting Issues:Multilevel contextab (including history, policy climate, and incentives) | no   | no      | no  | no  | Yes | no  | no  | no  | no |
| 358 | S15 | A Framework for Enhancing the Value of F Neta Gila        | Planning : Partnership                                  | Cross-Cutting Issues:Multilevel contextab (including history, policy climate, and incentives) | no   | no      | no  | no  | Yes | no  | no  | no  | no |
| 359 | S15 | A Framework for Enhancing the Value of F Neta Gila        | Planning : DB&I study design                            | Cross-Cutting Issues:Multilevel contextab (including history, policy climate, and incentives) | no   | no      | no  | no  | Yes | no  | no  | no  | no |
| 360 | S15 | A Framework for Enhancing the Value of F Neta Gila        | Delivery : Reach                                        | Cross-Cutting Issues:Multilevel contextab (including history, policy climate, and incentives) | no   | no      | no  | no  | Yes | no  | no  | no  | no |
| 361 | S15 | A Framework for Enhancing the Value of F Neta Gila        | Delivery : Adoption                                     | Cross-Cutting Issues:Multilevel contextab (including history, policy climate, and incentives) | no   | no      | no  | no  | Yes | no  | no  | no  | no |
| 362 | S15 | A Framework for Enhancing the Value of F Neta Gila        | Delivery : Evolution of intervention and implement      | Cross-Cutting Issues:Multilevel contextab (including history, policy climate, and incentives) | no   | no      | no  | no  | Yes | no  | no  | no  | no |
| 363 | S15 | A Framework for Enhancing the Value of F Neta Gila        | Delivery : Implementation : Fidelity,                   | Cross-Cutting Issues:Multilevel contextab (including history, policy climate, and incentives) | no   | no      | no  | no  | Yes | no  | no  | no  | no |
| 364 | S15 | A Framework for Enhancing the Value of F Neta Gila        | Delivery : Implementation : dose,                       | Cross-Cutting Issues:Multilevel contextab (including history, policy climate, and incentives) | no   | no      | no  | no  | Yes | no  | no  | no  | no |
| 365 | S15 | A Framework for Enhancing the Value of F Neta Gila        | Delivery : Implementation : and adaptation              | Cross-Cutting Issues:Multilevel contextab (including history, policy climate, and incentives) | no   | no      | no  | no  | Yes | no  | no  | no  | no |
| 366 | S15 | A Framework for Enhancing the Value of F Neta Gila        | Delivery : Implementation costs and resources exp       | Cross-Cutting Issues:Multilevel contextab (including history, policy climate, and incentives) | no   | no      | no  | no  | Yes | no  | no  | no  | no |
| 367 | S15 | A Framework for Enhancing the Value of F Neta Gila        | Evaluation/ResultsReporting : Effectiveness             | Cross-Cutting Issues:Multilevel contextab (including history, policy climate, and incentives) | no   | no      | no  | no  | Yes | Yes | no  | no  | no |
| 368 | S15 | A Framework for Enhancing the Value of F Neta Gila        | Evaluation/ResultsReporting : Primary outcome           | Cross-Cutting Issues:Multilevel contextab (including history, policy climate, and incentives) | no   | no      | no  | no  | Yes | Yes | no  | no  | no |
| 369 | S15 | A Framework for Enhancing the Value of F Neta Gila        | Evaluation/ResultsReporting : Broader consequen         | Cross-Cutting Issues:Multilevel contextab (including history, policy climate, and incentives) | no   | no      | no  | no  | Yes | Yes | no  | no  | no |
| 370 | S15 | A Framework for Enhancing the Value of F Neta Gila        | Evaluation/ResultsReporting : External validity of find | Cross-Cutting Issues:Multilevel contextab (including history, policy climate, and incentives) | no   | no      | no  | no  | Yes | Yes | no  | no  | no |
| 371 | S15 | A Framework for Enhancing the Value of F Neta Gila        | Evaluation/ResultsReporting : Robustness                | Cross-Cutting Issues:Multilevel contextab (including history, policy climate, and incentives) | no   | no      | no  | no  | Yes | Yes | no  | no  | no |
| 372 | S15 | A Framework for Enhancing the Value of F Neta Gila        | Evaluation/ResultsReporting : Pragmatic criteria        | Cross-Cutting Issues:Multilevel contextab (including history, policy climate, and incentives) | no   | no      | no  | no  | Yes | Yes | no  | no  | no |
| 373 | S15 | A Framework for Enhancing the Value of F Neta Gila        | Long-Term Outcomes : Sustainability                     | Cross-Cutting Issues:Multilevel contextab (including history, policy climate, and incentives) | no   | no      | no  | no  | Yes | Yes | no  | no  | no |
| 374 | S15 | A Framework for Enhancing the Value of F Neta Gila        | Long-Term Outcomes : Evolvability                       | Cross-Cutting Issues:Multilevel contextab (including history, policy climate, and incentives) | no   | no      | no  | no  | Yes | Yes | no  | no  | no |
| 375 | S15 | A Framework for Enhancing the Value of F Neta Gila        | Long-Term Outcomes : Transportability                   | Cross-Cutting Issues:Multilevel contextab (including history, policy climate, and incentives) | no   | no      | no  | no  | Yes | Yes | no  | no  | no |
| 376 | S15 | A Framework for Enhancing the Value of F Neta Gila        | Long-Term Outcomes : Replication and uptake: Con        | Cross-Cutting Issues:Multilevel contextab (including history, policy climate, and incentives) | no   | no      | no  | no  | Yes | Yes | no  | no  | no |
| 377 | S15 | A Framework for Enhancing the Value of F Neta Gila        | Long-Term Outcomes : Economic evaluation affect         | Cross-Cutting Issues:Multilevel contextab (including history, policy climate, and incentives) | no   | no      | no  | no  | Yes | Yes | no  | no  | no |
| 378 | S16 | Development of a framework for reportin O'Donnell Siobhan | why: Why was the health service delivery model f        | Goals of the model Goals related to patient outcome(s);                                       | list | table 2 | no  | no  | no  | no  | yes | no  | no |
| 379 | S16 | Development of a framework for reportin O'Donnell Siobhan | Who: Who was involved?                                  | Provider(s) Health care professional na                                                       | list | table 2 | no  | no  | no  | no  | yes | no  | no |
| 380 | S16 | Development of a framework for reportin O'Donnell Siobhan | what: What were the roles of the individuals invol      | Role of provider(s)Role of user(s)                                                            | list | table 2 | no  | no  | no  | no  | yes | no  | no |
| 381 | S16 | Development of a framework for reportin O'Donnell Siobhan | When: When were the health services/interventi          | Duration of disease since onset of sy na                                                      | list | table 2 | no  | no  | no  | no  | yes | no  | no |
| 382 | S16 | Development of a framework for reportin O'Donnell Siobhan | where: Where were the health services/interven          | SettingCountryLevel of care: comm na                                                          | list | table 2 | no  | no  | no  | no  | yes | no  | no |
| 383 | S16 | Development of a framework for reportin O'Donnell Siobhan | How: How did patients access the service(s)/inter       | Referral process                                                                              | list | table 2 | no  | no  | no  | no  | yes | no  | no |
| 384 | S16 | Development of a framework for reportin O'Donnell Siobhan | How: How were the services/interventions imple          | Method(s) in which the intervention na                                                        | list | table 2 | no  | no  | no  | no  | yes | no  | no |
| 385 | S16 | Development of a framework for reportin O'Donnell Siobhan | How: How long was the intervention?                     | Duration of the intervention                                                                  | list | table 2 | no  | no  | no  | no  | yes | no  | no |
| 386 | S16 | Development of a framework for reportin O'Donnell Siobhan | How: How did individuals involved communicate?          | Mode(s) of communication (Among p na                                                          | list | table 2 | no  | no  | no  | no  | yes | no  | no |
| 387 | S16 | Development of a framework for reportin O'Donnell Siobhan | How: How was the health service delivery model          | Resources needed to support or sus na                                                         | list | table 2 | no  | no  | no  | no  | yes | no  | no |
| 388 | S17 | SQUIRE Guidelines for reporting improver Ogrinc G         | Indicate that the manuscript concerns an initiati       | na                                                                                            | list | table 1 | yes | no  | no  | no  | no  | no  | no |
| 389 | S17 | SQUIRE Guidelines for reporting improver Ogrinc G         | Provide adequate information to aid in searching        | na                                                                                            | list | table 1 | no  | yes | no  | no  | no  | no  | no |
| 390 | S17 | SQUIRE Guidelines for reporting improver Ogrinc G         | Summarise all key information from various sections     | of the text using the abstract format                                                         | list | table 1 | no  | yes | no  | no  | no  | no  | no |
| 391 | S17 | SQUIRE Guidelines for reporting improver Ogrinc G         | Problem description: Nature and significance of t       | na                                                                                            | list | table 1 | no  | no  | yes | no  | no  | no  | no |
| 392 | S17 | SQUIRE Guidelines for reporting improver Ogrinc G         | Available knowledge: Summary of what is current         | na                                                                                            | list | table 1 | no  | no  | yes | no  | no  | no  | no |
| 393 | S17 | SQUIRE Guidelines for reporting improver Ogrinc G         | Rationale: Informal or formal frameworks, model         | na                                                                                            | list | table 1 | no  | no  | yes | no  | no  | no  | no |
| 394 | S17 | SQUIRE Guidelines for reporting improver Ogrinc G         | Specific aims: Purpose of the project and of this r     | na                                                                                            | list | table 1 | no  | no  | yes | no  | no  | no  | no |
| 395 | S17 | SQUIRE Guidelines for reporting improver Ogrinc G         | Context: Contextual elements considered import          | na                                                                                            | list | table 1 | no  | no  | no  | no  | yes | no  | no |
| 396 | S17 | SQUIRE Guidelines for reporting improver Ogrinc G         | Intervention(s): Description of the intervention(s);    | na                                                                                            | list | table 1 | no  | no  | no  | no  | yes | no  | no |

|     |     |                                             |                    |                                                                                                                                                                                                                                                                         |                                                       |    |      |              |    |    |    |     |     |     |     |
|-----|-----|---------------------------------------------|--------------------|-------------------------------------------------------------------------------------------------------------------------------------------------------------------------------------------------------------------------------------------------------------------------|-------------------------------------------------------|----|------|--------------|----|----|----|-----|-----|-----|-----|
| 397 | S17 | SQUIRE Guidelines for reporting improver    | Ogrinc G           | Intervention(s): Specifics of the team involved in                                                                                                                                                                                                                      | na                                                    | na | list | table 1      | no | no | no | yes | no  | no  | no  |
| 398 | S17 | SQUIRE Guidelines for reporting improver    | Ogrinc G           | Study of the intervention(s): Approach chosen for                                                                                                                                                                                                                       | na                                                    | na | list | table 1      | no | no | no | yes | no  | no  | no  |
| 399 | S17 | SQUIRE Guidelines for reporting improver    | Ogrinc G           | Study of the intervention(s): Approach used to es                                                                                                                                                                                                                       | na                                                    | na | list | table 1      | no | no | no | yes | no  | no  | no  |
| 400 | S17 | SQUIRE Guidelines for reporting improver    | Ogrinc G           | Measures: Measures chosen for studying process                                                                                                                                                                                                                          | na                                                    | na | list | table 1      | no | no | no | yes | no  | no  | no  |
| 401 | S17 | SQUIRE Guidelines for reporting improver    | Ogrinc G           | Measures: Description of the approach to the onj                                                                                                                                                                                                                        | na                                                    | na | list | table 1      | no | no | no | yes | no  | no  | no  |
| 402 | S17 | SQUIRE Guidelines for reporting improver    | Ogrinc G           | Measures: Methods employed for assessing comj                                                                                                                                                                                                                           | na                                                    | na | list | table 1      | no | no | no | yes | no  | no  | no  |
| 403 | S17 | SQUIRE Guidelines for reporting improver    | Ogrinc G           | Analysis: Qualitative and quantitative methods u                                                                                                                                                                                                                        | na                                                    | na | list | table 1      | no | no | no | yes | no  | no  | no  |
| 404 | S17 | SQUIRE Guidelines for reporting improver    | Ogrinc G           | Analysis: Methods for understanding variation w                                                                                                                                                                                                                         | na                                                    | na | list | table 1      | no | no | no | yes | no  | no  | no  |
| 405 | S17 | SQUIRE Guidelines for reporting improver    | Ogrinc G           | Ethical considerations: Ethical aspects of implm                                                                                                                                                                                                                        | na                                                    | na | list | table 1      | no | no | no | yes | no  | no  | no  |
| 406 | S17 | SQUIRE Guidelines for reporting improver    | Ogrinc G           | Initial steps of the intervention(s) and their evolu                                                                                                                                                                                                                    | na                                                    | na | list | table 1      | no | no | no | no  | yes | no  | no  |
| 407 | S17 | SQUIRE Guidelines for reporting improver    | Ogrinc G           | Details of the process measures and outcomes                                                                                                                                                                                                                            | na                                                    | na | list | table 1      | no | no | no | no  | yes | no  | no  |
| 408 | S17 | SQUIRE Guidelines for reporting improver    | Ogrinc G           | Contextual elements that interacted with the intr                                                                                                                                                                                                                       | na                                                    | na | list | table 1      | no | no | no | no  | yes | no  | no  |
| 409 | S17 | SQUIRE Guidelines for reporting improver    | Ogrinc G           | Observed associations between outcomes, interv                                                                                                                                                                                                                          | na                                                    | na | list | table 1      | no | no | no | no  | yes | no  | no  |
| 410 | S17 | SQUIRE Guidelines for reporting improver    | Ogrinc G           | Unintended consequences such as unexpected b                                                                                                                                                                                                                            | na                                                    | na | list | table 1      | no | no | no | no  | yes | no  | no  |
| 411 | S17 | SQUIRE Guidelines for reporting improver    | Ogrinc G           | Details about missing data.                                                                                                                                                                                                                                             | na                                                    | na | list | table 1      | no | no | no | no  | yes | no  | no  |
| 412 | S17 | SQUIRE Guidelines for reporting improver    | Ogrinc G           | Summary: Key findings, including relevance to th                                                                                                                                                                                                                        | na                                                    | na | list | table 1      | no | no | no | no  | no  | yes | no  |
| 413 | S17 | SQUIRE Guidelines for reporting improver    | Ogrinc G           | Summary: Particular strengths of the project.                                                                                                                                                                                                                           | na                                                    | na | list | table 1      | no | no | no | no  | no  | yes | no  |
| 414 | S17 | SQUIRE Guidelines for reporting improver    | Ogrinc G           | Interpretation: Nature of the association betwe                                                                                                                                                                                                                         | na                                                    | na | list | table 1      | no | no | no | no  | no  | yes | no  |
| 415 | S17 | SQUIRE Guidelines for reporting improver    | Ogrinc G           | Interpretation: Comparison of results with findi                                                                                                                                                                                                                        | na                                                    | na | list | table 1      | no | no | no | no  | no  | yes | no  |
| 416 | S17 | SQUIRE Guidelines for reporting improver    | Ogrinc G           | Interpretation: Impact of the project on people                                                                                                                                                                                                                         | na                                                    | na | list | table 1      | no | no | no | no  | no  | yes | no  |
| 417 | S17 | SQUIRE Guidelines for reporting improver    | Ogrinc G           | Interpretation: Reasons for any differences betw                                                                                                                                                                                                                        | na                                                    | na | list | table 1      | no | no | no | no  | no  | yes | no  |
| 418 | S17 | SQUIRE Guidelines for reporting improver    | Ogrinc G           | Interpretation: Costs and strategic trade-offs, incl                                                                                                                                                                                                                    | na                                                    | na | list | table 1      | no | no | no | no  | no  | yes | no  |
| 419 | S17 | SQUIRE Guidelines for reporting improver    | Ogrinc G           | Limitations: Limits to the generalisability of the w                                                                                                                                                                                                                    | na                                                    | na | list | table 1      | no | no | no | no  | no  | yes | no  |
| 420 | S17 | SQUIRE Guidelines for reporting improver    | Ogrinc G           | Limitations: Factors that might have limited inter                                                                                                                                                                                                                      | na                                                    | na | list | table 1      | no | no | no | no  | no  | yes | no  |
| 421 | S17 | SQUIRE Guidelines for reporting improver    | Ogrinc G           | Limitations: Efforts made to minimise and adjust                                                                                                                                                                                                                        | na                                                    | na | list | table 1      | no | no | no | no  | no  | yes | no  |
| 422 | S17 | SQUIRE Guidelines for reporting improver    | Ogrinc G           | Conclusions: Usefulness of the work.                                                                                                                                                                                                                                    | na                                                    | na | list | table 1      | no | no | no | no  | no  | yes | no  |
| 423 | S17 | SQUIRE Guidelines for reporting improver    | Ogrinc G           | Conclusions: Sustainability.                                                                                                                                                                                                                                            | na                                                    | na | list | table 1      | no | no | no | no  | no  | yes | no  |
| 424 | S17 | SQUIRE Guidelines for reporting improver    | Ogrinc G           | Conclusions: Potential for spread to other contex                                                                                                                                                                                                                       | na                                                    | na | list | table 1      | no | no | no | no  | no  | yes | no  |
| 425 | S17 | SQUIRE Guidelines for reporting improver    | Ogrinc G           | Conclusions: Implications for practice and for futr                                                                                                                                                                                                                     | na                                                    | na | list | table 1      | no | no | no | no  | no  | yes | no  |
| 426 | S17 | SQUIRE Guidelines for reporting improver    | Ogrinc G           | Conclusions: Suggested next steps.                                                                                                                                                                                                                                      | na                                                    | na | list | table 1      | no | no | no | no  | no  | yes | no  |
| 427 | S17 | SQUIRE Guidelines for reporting improver    | Ogrinc G           | Funding: Sources of funding that supported this v                                                                                                                                                                                                                       | na                                                    | na | list | table 1      | no | no | no | no  | no  | no  | yes |
| 452 | S20 | Economic evaluations of public health im    | Reeves, p          | Background and objectives : Provide an explicit statement of the economic evidence of the index policy or programme targeted by the intervention                                                                                                                        | na                                                    | na | list | Table 6      | no | no | no | yes | no  | no  | no  |
| 453 | S20 | Economic evaluations of public health im    | Reeves, p          | Background and objectives : Consider the policy ; na                                                                                                                                                                                                                    | na                                                    | na | list | Table 6      | no | no | no | yes | no  | no  | no  |
| 454 | S20 | Economic evaluations of public health im    | Reeves, p          | Target population and subgroups : Include study participant characteristics relevant for informing equity considerations, e.g., the health status and 'gap' by sex, age and socio-economic status                                                                       | na                                                    | na | list | Table 6      | no | no | no | yes | no  | no  | no  |
| 455 | S20 | Economic evaluations of public health im    | Reeves, p          | Study perspective : Where possible adopt a social                                                                                                                                                                                                                       | na                                                    | na | list | Table 6      | no | no | no | yes | no  | no  | no  |
| 456 | S20 | Economic evaluations of public health im    | Reeves, p          | Choice of health outcomes and measurement of effectiveness : Depending on the knowledge of cost-effectiveness of the index policy/programme, consider measuring intermediate outcomes relevant to implementation and use economic modelling to extrapolate to the final | na                                                    | na | list | Table 6      | no | no | no | yes | no  | no  | no  |
| 457 | S20 | Economic evaluations of public health im    | Reeves, p          | Estimating resource use and costs : Consider identifying, measuring and valuing resource use associated with both development and implementation interventions                                                                                                          | na                                                    | na | list | Table 6      | no | no | no | yes | no  | no  | no  |
| 458 | S20 | Economic evaluations of public health im    | Reeves, p          | Characterising uncertainty and heterogeneity : Consider variation in parameters relevant to implementation, e.g., realists and uptake                                                                                                                                   | na                                                    | na | list | Table 6      | no | no | no | yes | no  | no  | no  |
| 459 | S20 | Economic evaluations of public health im    | Reeves, p          | Distributional impacts : If applicable (refer item n                                                                                                                                                                                                                    | na                                                    | na | list | Table 6      | no | no | no | yes | no  | no  | no  |
| 460 | S21 | Is reporting on interventions a weak link i | Riley, Barbara L   | Integration of relevant theories                                                                                                                                                                                                                                        | Descriptions of theories, including a                 | na | list | table 2 to 7 | no | no | no | yes | no  | no  | no  |
| 461 | S21 | Is reporting on interventions a weak link i | Riley, Barbara L   | Combinations and sequencing/staging of interve                                                                                                                                                                                                                          | Descriptions of the deliberate combination of         | na | list | table 2 to 7 | no | no | no | yes | no  | no  | no  |
| 462 | S21 | Is reporting on interventions a weak link i | Riley, Barbara L   | Coordinating and integrating intervention efforts                                                                                                                                                                                                                       | Descriptions of complementary interventions           | na | list | table 2 to 7 | no | no | no | yes | no  | no  | no  |
| 463 | S21 | Is reporting on interventions a weak link i | Riley, Barbara L   | Adequate implementation:Quantitative descripti                                                                                                                                                                                                                          | time period                                           | na | list | table 2 to 7 | no | no | no | yes | no  | no  | no  |
| 464 | S21 | Is reporting on interventions a weak link i | Riley, Barbara L   | Adequate implementation:Quantitative descripti                                                                                                                                                                                                                          | depth of engagement such as passiv                    | na | list | table 2 to 7 | no | no | no | yes | no  | no  | no  |
| 465 | S21 | Is reporting on interventions a weak link i | Riley, Barbara L   | Adequate implementation:Quantitative descripti                                                                                                                                                                                                                          | depth of engagement such as passiv                    | na | list | table 2 to 7 | no | no | no | yes | no  | no  | no  |
| 466 | S21 | Is reporting on interventions a weak link i | Riley, Barbara L   | Adequate implementation:Quantitative descripti                                                                                                                                                                                                                          | total educational time, total minute                  | na | list | table 2 to 7 | no | no | no | yes | no  | no  | no  |
| 467 | S21 | Is reporting on interventions a weak link i | Riley, Barbara L   | Adequate implementation:Quantitative descripti                                                                                                                                                                                                                          | direct funding or in-kind contributi                  | na | list | table 2 to 7 | no | no | no | yes | no  | no  | no  |
| 468 | S21 | Is reporting on interventions a weak link i | Riley, Barbara L   | Adequate implementation:Quantitative descripti                                                                                                                                                                                                                          | e.g., total number of participants, p                 | na | list | table 2 to 7 | no | no | no | yes | no  | no  | no  |
| 469 | S21 | Is reporting on interventions a weak link i | Riley, Barbara L   | Appropriate implementation: Qualitative descripti                                                                                                                                                                                                                       | implementing all essential compon                     | na | list | table 2 to 7 | no | no | no | no  | yes | no  | no  |
| 470 | S21 | Is reporting on interventions a weak link i | Riley, Barbara L   | Appropriate implementation: Qualitative descripti                                                                                                                                                                                                                       | na                                                    | na | list | table 2 to 7 | no | no | no | no  | yes | no  | no  |
| 471 | S21 | Is reporting on interventions a weak link i | Riley, Barbara L   | Appropriate implementation: Qualitative descripti                                                                                                                                                                                                                       | na                                                    | na | list | table 2 to 7 | no | no | no | no  | yes | no  | no  |
| 472 | S21 | Is reporting on interventions a weak link i | Riley, Barbara L   | Enabling structures and conditions                                                                                                                                                                                                                                      | Descriptions of the creation of structures            | na | list | table 2 to 7 | no | no | no | yes | no  | no  | no  |
| 473 | S21 | Is reporting on interventions a weak link i | Riley, Barbara L   | Adaptation to the contextual environment                                                                                                                                                                                                                                | Descriptions regarding the adjusting                  | na | list | table 2 to 7 | no | no | no | no  | yes | no  | no  |
| 474 | S21 | Is reporting on interventions a weak link i | Riley, Barbara L   | Responsive to evaluation feedback                                                                                                                                                                                                                                       | Descriptions regarding the collection                 | na | list | table 2 to 7 | no | no | no | no  | yes | no  | no  |
| 475 | S21 | Is reporting on interventions a weak link i | Riley, Barbara L   | Sustainability                                                                                                                                                                                                                                                          | Discussion regarding the continuation or extension of | na | list | table 2 to 7 | no | no | no | no  | yes | yes | no  |
| 476 | S22 | Reporting guidelines for implementation i   | Yousafzai, Aisha K | Previous evidence about the intervention                                                                                                                                                                                                                                | (1) Briefly describe the nature and s                 | na | list | Table 1      | no | no | no | yes | no  | no  | no  |
| 477 | S22 | Reporting guidelines for implementation i   | Yousafzai, Aisha K | Effectiveness of the present intervention (if know                                                                                                                                                                                                                      | If the effectiveness of the specific ir               | na | list | Table 1      | no | no | no | yes | no  | no  | no  |
| 478 | S22 | Reporting guidelines for implementation i   | Yousafzai, Aisha K | Rationale for the implementation research                                                                                                                                                                                                                               | Explain why the implementation re: na                 | na | list | Table 1      | no | no | no | yes | no  | no  | no  |
| 479 | S22 | Reporting guidelines for implementation i   | Yousafzai, Aisha K | Aims and objectives of the implementation resea                                                                                                                                                                                                                         | List the aims and objectives of the i                 | na | list | Table 1      | no | no | no | yes | no  | no  | no  |
| 480 | S22 | Reporting guidelines for implementation i   | Yousafzai, Aisha K | Context of implementation for the intervention                                                                                                                                                                                                                          | Briefly describe the setting for the i                | na | list | Table 1      | no | no | no | yes | no  | no  | no  |
| 481 | S22 | Reporting guidelines for implementation i   | Yousafzai, Aisha K | Implementation strategy for the intervention                                                                                                                                                                                                                            | Describe the implementation strate                    | na | list | Table 1      | no | no | no | no  | yes | no  | no  |
| 482 | S22 | Reporting guidelines for implementation i   | Yousafzai, Aisha K | Implementation recipients for the intervention                                                                                                                                                                                                                          | Include a summary about the recipi                    | na | list | Table 1      | no | no | no | no  | yes | no  | no  |
| 483 | S22 | Reporting guidelines for implementation i   | Yousafzai, Aisha K | Intended intervention content                                                                                                                                                                                                                                           | Describe the intervention in the intr                 | na | list | Table 1      | no | no | no | no  | yes | no  | no  |
| 484 | S22 | Reporting guidelines for implementation i   | Yousafzai, Aisha K | Changes to intervention content                                                                                                                                                                                                                                         | Provide information about, and exp                    | na | list | Table 1      | no | no | no | no  | yes | no  | no  |
| 485 | S22 | Reporting guidelines for implementation i   | Yousafzai, Aisha K | Intended intensity/total exposure to the interven                                                                                                                                                                                                                       | Provide information for the intervei                  | na | list | Table 1      | no | no | no | no  | yes | no  | no  |
| 486 | S22 | Reporting guidelines for implementation i   | Yousafzai, Aisha K | Personnel involved in supporting the implementa                                                                                                                                                                                                                         | Briefly describe information about t                  | na | list | Table 1      | no | no | no | no  | yes | no  | no  |
| 487 | S22 | Reporting guidelines for implementation i   | Yousafzai, Aisha K | Personnel delivering the intervention (e.g., moth                                                                                                                                                                                                                       | (1) Describe the delivery agent for t                 | na | list | Table 1      | no | no | no | no  | yes | no  | no  |
| 488 | S22 | Reporting guidelines for implementation i   | Yousafzai, Aisha K | Methods to assess fidelity regarding delivery of ir                                                                                                                                                                                                                     | Describe the methods and tools use                    | na | list | Table 1      | no | no | no | no  | yes | no  | no  |
| 489 | S22 | Reporting guidelines for implementation i   | Yousafzai, Aisha K | Methods to assess understanding and enactment                                                                                                                                                                                                                           | Describe the methods and tools use                    | na | list | Table 1      | no | no | no | no  | yes | no  | no  |

|     |     |                                                  |                    |                                                                                                     |                                                                                                                                                                                                                                                                                                                        |                       |     |     |     |     |     |     |    |
|-----|-----|--------------------------------------------------|--------------------|-----------------------------------------------------------------------------------------------------|------------------------------------------------------------------------------------------------------------------------------------------------------------------------------------------------------------------------------------------------------------------------------------------------------------------------|-----------------------|-----|-----|-----|-----|-----|-----|----|
| 490 | S22 | Reporting guidelines for implementation research | Yousafzai, Aisha K | Implementation research data collection team                                                        | Describe the data collection team with a list                                                                                                                                                                                                                                                                          | Table 1               | no  | no  | no  | yes | no  | no  | no |
| 491 | S22 | Reporting guidelines for implementation research | Yousafzai, Aisha K | Sampling and data management procedures                                                             | (1) Describe the sample size, sampling method and data management procedures                                                                                                                                                                                                                                           | Table 1               | no  | no  | no  | yes | no  | no  | no |
| 492 | S22 | Reporting guidelines for implementation research | Yousafzai, Aisha K | Plan of analysis for implementation data                                                            | Describe the plan of analysis. For quantitative studies, describe the statistical methods to be used                                                                                                                                                                                                                   | Table 1               | no  | no  | no  | yes | no  | no  | no |
| 493 | S22 | Reporting guidelines for implementation research | Yousafzai, Aisha K | Results of the implementation evaluation                                                            | Present the results for all variables: numerical, categorical and binary                                                                                                                                                                                                                                               | Table 1               | no  | no  | no  | no  | yes | no  | no |
| 494 | S22 | Reporting guidelines for implementation research | Yousafzai, Aisha K | Interpretation of findings of the implementation evaluation                                         | Provide interpretation of the findings in the context of the research objectives                                                                                                                                                                                                                                       | Table 1               | no  | no  | no  | no  | no  | yes | no |
| 495 | S22 | Reporting guidelines for implementation research | Yousafzai, Aisha K | Strengths and limitations of the implementation evaluation                                          | Describe the strengths and limitations of the implementation evaluation                                                                                                                                                                                                                                                | Table 1               | no  | no  | no  | no  | no  | yes | no |
| 496 | S22 | Reporting guidelines for implementation research | Yousafzai, Aisha K | Scalability and sustainability of the intervention                                                  | Consider any implications of the findings for scalability and sustainability                                                                                                                                                                                                                                           | Table 1               | no  | no  | no  | no  | no  | yes | no |
| 497 | S23 | A reporting guide for implementation science     | CCDR               | Title                                                                                               | Compose a title that includes the population, intervention and comparison                                                                                                                                                                                                                                              | Table 1               | yes | no  | no  | no  | no  | no  | no |
| 498 | S23 | A reporting guide for implementation science     | CCDR               | Abstract                                                                                            | Provide a 200 to 250-word abstract                                                                                                                                                                                                                                                                                     | Table 1               | no  | yes | no  | no  | no  | no  | no |
| 499 | S23 | A reporting guide for implementation science     | CCDR               | Issue identification                                                                                | Identify the topic of the study and the population                                                                                                                                                                                                                                                                     | Table 1               | no  | no  | yes | no  | no  | no  | no |
| 500 | S23 | A reporting guide for implementation science     | CCDR               | What is known to date                                                                               | Provide a summary of the literature                                                                                                                                                                                                                                                                                    | Table 1               | no  | no  | yes | no  | no  | no  | no |
| 501 | S23 | A reporting guide for implementation science     | CCDR               | Rationale for study                                                                                 | Identify the rationale for the implementation                                                                                                                                                                                                                                                                          | Table 1               | no  | no  | yes | no  | no  | no  | no |
| 502 | S23 | A reporting guide for implementation science     | CCDR               | Objective                                                                                           | State the objective of the intervention                                                                                                                                                                                                                                                                                | Table 1               | no  | no  | yes | no  | no  | no  | no |
| 503 | S23 | A reporting guide for implementation science     | CCDR               | Intervention:Setting/ participants                                                                  | Describe the setting and population                                                                                                                                                                                                                                                                                    | Table 1               | no  | no  | no  | yes | no  | no  | no |
| 504 | S23 | A reporting guide for implementation science     | CCDR               | Intervention: Ethics review if indicated                                                            | For studies involving human participants, describe the ethics review process                                                                                                                                                                                                                                           | Table 1               | no  | no  | no  | yes | no  | no  | no |
| 505 | S23 | A reporting guide for implementation science     | CCDR               | Intervention: Intervention                                                                          | Describe the intervention and how it is delivered                                                                                                                                                                                                                                                                      | Table 1               | no  | no  | no  | yes | no  | no  | no |
| 506 | S23 | A reporting guide for implementation science     | CCDR               | Intervention:Outcome measures                                                                       | Describe how the intervention was evaluated                                                                                                                                                                                                                                                                            | Table 1               | no  | no  | no  | yes | no  | no  | no |
| 507 | S23 | A reporting guide for implementation science     | CCDR               | Outcomes: Setting/ participants                                                                     | Present the findings in enough detail to allow for replication                                                                                                                                                                                                                                                         | Table 1               | no  | no  | no  | no  | yes | no  | no |
| 508 | S23 | A reporting guide for implementation science     | CCDR               | Outcomes: Primary outcomes                                                                          | Present the primary outcome measures                                                                                                                                                                                                                                                                                   | Table 1               | no  | no  | no  | no  | yes | no  | no |
| 509 | S23 | A reporting guide for implementation science     | CCDR               | Outcomes: Secondary outcomes                                                                        | Provide any secondary outcome measures                                                                                                                                                                                                                                                                                 | Table 1               | no  | no  | no  | no  | yes | no  | no |
| 510 | S23 | A reporting guide for implementation science     | CCDR               | Outcomes: Intervention experience                                                                   | Describe any insights that arose as a result of the intervention                                                                                                                                                                                                                                                       | Table 1               | no  | no  | no  | no  | yes | no  | no |
| 511 | S23 | A reporting guide for implementation science     | CCDR               | Summary of key findings                                                                             | Summarize and interpret the key findings                                                                                                                                                                                                                                                                               | Table 1               | no  | no  | no  | no  | no  | yes | no |
| 512 | S23 | A reporting guide for implementation science     | CCDR               | Comparisons                                                                                         | Compare the results of the intervention with the control                                                                                                                                                                                                                                                               | Table 1               | no  | no  | no  | no  | no  | yes | no |
| 513 | S23 | A reporting guide for implementation science     | CCDR               | Strengths and limitations                                                                           | Identify the strengths and limitations of the study                                                                                                                                                                                                                                                                    | Table 1               | no  | no  | no  | no  | no  | yes | no |
| 514 | S23 | A reporting guide for implementation science     | CCDR               | Implications and next steps                                                                         | Consider implications, next steps or recommendations                                                                                                                                                                                                                                                                   | Table 1               | no  | no  | no  | no  | no  | yes | no |
| 515 | S23 | A reporting guide for implementation science     | CCDR               | Conclusion                                                                                          | Ensure the conclusion integrates the findings and implications                                                                                                                                                                                                                                                         | Table 1               | no  | no  | no  | no  | no  | yes | no |
| 516 | S23 | A reporting guide for implementation science     | CCDR               | Illustrating key findings                                                                           | When appropriate, include an illustration                                                                                                                                                                                                                                                                              | Table 1               | no  | no  | no  | no  | no  | yes | no |
| 517 | S24 | A guide to scaling up population health in       | Milat, Andrew J    | Assess effectiveness                                                                                | Determine effectiveness, intervention                                                                                                                                                                                                                                                                                  | Table 1               | no  | no  | no  | yes | no  | no  | no |
| 518 | S24 | A guide to scaling up population health in       | Milat, Andrew J    | Assess potential reach and adoption                                                                 | Determine if the likely reach and adoption                                                                                                                                                                                                                                                                             | Table 1               | no  | no  | no  | yes | no  | no  | no |
| 519 | S24 | A guide to scaling up population health in       | Milat, Andrew J    | Assess alignment with the strategic context                                                         | Determine whether the intervention aligns with the strategic context                                                                                                                                                                                                                                                   | Table 1               | no  | no  | no  | yes | no  | no  | no |
| 520 | S24 | A guide to scaling up population health in       | Milat, Andrew J    | Assess acceptability and feasibility                                                                | Judge whether the intervention could be implemented                                                                                                                                                                                                                                                                    | Table 1               | no  | no  | yes | yes | no  | no  | no |
| 521 | S24 | A guide to scaling up population health in       | Milat, Andrew J    | Document a rationale for scale-up                                                                   | Draw up a rationale for scaling up                                                                                                                                                                                                                                                                                     | Table 1               | no  | no  | yes | yes | no  | no  | no |
| 522 | S24 | A guide to scaling up population health in       | Milat, Andrew J    | Describe the intervention                                                                           | Describe 'what' will be scaled up                                                                                                                                                                                                                                                                                      | Table 1               | no  | yes | yes | yes | no  | no  | no |
| 523 | S24 | A guide to scaling up population health in       | Milat, Andrew J    | Complete a situational and stakeholder analysis                                                     | Map the social, political and organisational context                                                                                                                                                                                                                                                                   | Table 1               | no  | no  | no  | yes | no  | no  | no |
| 524 | S24 | A guide to scaling up population health in       | Milat, Andrew J    | Determine who could be involved in scale-up and how                                                 | Consider who might perform key functions                                                                                                                                                                                                                                                                               | Table 1               | no  | no  | no  | yes | no  | no  | no |
| 525 | S24 | A guide to scaling up population health in       | Milat, Andrew J    | Select an approach to scaling up                                                                    | There are two main approaches to scaling up: 'top-down' and 'bottom-up'                                                                                                                                                                                                                                                | Table 1               | no  | no  | no  | yes | no  | no  | no |
| 526 | S24 | A guide to scaling up population health in       | Milat, Andrew J    | Consider options for evaluation and monitoring                                                      | Determine what variables are important to monitor                                                                                                                                                                                                                                                                      | Table 1               | no  | no  | no  | yes | no  | no  | no |
| 527 | S24 | A guide to scaling up population health in       | Milat, Andrew J    | Estimate resources required for scale-up                                                            | Estimate the human, technical and financial resources                                                                                                                                                                                                                                                                  | Table 1               | no  | no  | no  | yes | no  | no  | no |
| 528 | S24 | A guide to scaling up population health in       | Milat, Andrew J    | Write up the scaling up plan                                                                        | The plan should present a clear and concise rationale for scale-up                                                                                                                                                                                                                                                     | Table 1               | no  | no  | no  | yes | no  | no  | no |
| 529 | S24 | A guide to scaling up population health in       | Milat, Andrew J    | Consult with stakeholders                                                                           | Assess the appropriateness and acceptability of the intervention                                                                                                                                                                                                                                                       | Table 1               | no  | no  | no  | yes | no  | no  | no |
| 530 | S24 | A guide to scaling up population health in       | Milat, Andrew J    | Legitimise change                                                                                   | Gain the support of decision makers                                                                                                                                                                                                                                                                                    | Table 1               | no  | no  | no  | yes | no  | no  | no |
| 531 | S24 | A guide to scaling up population health in       | Milat, Andrew J    | Build a constituency                                                                                | Mobilise the broader 'community of interest'                                                                                                                                                                                                                                                                           | Table 1               | no  | no  | no  | yes | no  | no  | no |
| 532 | S24 | A guide to scaling up population health in       | Milat, Andrew J    | Realign and mobilise resources                                                                      | Mobilise financial resources through the budget                                                                                                                                                                                                                                                                        | Table 1               | no  | no  | no  | yes | no  | no  | no |
| 533 | S24 | A guide to scaling up population health in       | Milat, Andrew J    | Modify and strengthen organisations                                                                 | When scaling up interventions, modify and strengthen organisations                                                                                                                                                                                                                                                     | Table 1               | no  | no  | no  | yes | no  | no  | no |
| 534 | S24 | A guide to scaling up population health in       | Milat, Andrew J    | Coordinate action and governance                                                                    | Develop and implement concrete action plans                                                                                                                                                                                                                                                                            | Table 1               | no  | no  | no  | yes | no  | no  | no |
| 535 | S24 | A guide to scaling up population health in       | Milat, Andrew J    | Monitor performance and efficiency                                                                  | Develop systems that have an ongoing monitoring and evaluation plan                                                                                                                                                                                                                                                    | Table 1               | no  | no  | no  | yes | no  | no  | no |
| 536 | S24 | A guide to scaling up population health in       | Milat, Andrew J    | Ensure sustainability                                                                               | Implement organisational and cultural changes                                                                                                                                                                                                                                                                          | Table 1               | no  | no  | no  | no  | no  | yes | no |
| 537 | S25 | Standards for Reporting Implementation Research  | Pincock, Hilary    | Identification as an implementation study, and description of the problem, challenge, or deficiency | In addition to specifying the study context, authors should describe the problem, challenge, or deficiency                                                                                                                                                                                                             | Table 1 (explanation) | yes | no  | no  | no  | no  | no  | no |
| 538 | S25 | Standards for Reporting Implementation Research  | Pincock, Hilary    | Identification as an implementation study, and description of the problem, challenge, or deficiency | For clarity of indexing and identification, authors should use the following terms to describe their study: 'implementation study', 'evaluation', 'feasibility study', 'pilot study', 'preliminary study', 'proof of concept study', 'feasibility study', 'pilot study', 'preliminary study', 'proof of concept study' | Table 1 (explanation) | no  | yes | no  | no  | no  | no  | no |
| 539 | S25 | Standards for Reporting Implementation Research  | Pincock, Hilary    | Description of the problem, challenge, or deficiency                                                | Identifying and characterising the problem, challenge, or deficiency                                                                                                                                                                                                                                                   | Table 1 (explanation) | no  | no  | yes | no  | no  | no  | no |
| 540 | S25 | Standards for Reporting Implementation Research  | Pincock, Hilary    | The scientific background and rationale for the intervention                                        | Authors of implementation studies should explain the rationale for the choice of the intervention strategy and for the validity of the intervention being implemented                                                                                                                                                  | Table 1 (explanation) | no  | no  | no  | no  | no  | no  | no |
| 541 | S25 | Standards for Reporting Implementation Research  | Pincock, Hilary    | The scientific background and rationale for the intervention                                        | The scientific background and rationale for the intervention should be explained in the context of the problem, challenge, or deficiency                                                                                                                                                                               | Table 1 (explanation) | no  | no  | no  | no  | no  | no  | no |
| 542 | S25 | Standards for Reporting Implementation Research  | Pincock, Hilary    | The aims of the study, differentiating between primary and secondary outcomes                       | The aims and objectives should distinguish between primary and secondary outcomes                                                                                                                                                                                                                                      | Table 1 (explanation) | no  | no  | yes | no  | no  | no  | no |
| 543 | S25 | Standards for Reporting Implementation Research  | Pincock, Hilary    | The design and key features of the evaluation                                                       | The study design should be identified and described                                                                                                                                                                                                                                                                    | Table 1 (explanation) | no  | no  | no  | yes | no  | no  | no |
| 544 | S25 | Standards for Reporting Implementation Research  | Pincock, Hilary    | The context in which the intervention was implemented                                               | Successful implementation of evidence into practice is a planned, facilitated process that involves the interplay between individuals, evidence and context to promote evidence-informed practice                                                                                                                      | Table 1 (explanation) | no  | no  | no  | no  | no  | no  | no |
| 545 | S25 | Standards for Reporting Implementation Research  | Pincock, Hilary    | The characteristics of the targeted "site(s)" (local level)                                         | Recruitment is considered at two levels: the population targeted by the intervention and the population targeted by the evaluation                                                                                                                                                                                     | Table 1 (explanation) | no  | no  | no  | yes | no  | no  | no |
| 546 | S25 | Standards for Reporting Implementation Research  | Pincock, Hilary    | The population targeted by the intervention and the population targeted by the evaluation           | Recruitment is considered at two levels: the population targeted by the intervention and the population targeted by the evaluation                                                                                                                                                                                     | Table 1 (explanation) | no  | no  | no  | yes | no  | no  | no |
| 547 | S25 | Standards for Reporting Implementation Research  | Pincock, Hilary    | A description of the implementation strategy                                                        | Descriptions of implementation strategies and complex interventions are criticised if they are not clearly labelled, poorly described, rarely justified, not easy to understand and not sufficiently detailed to enable the intervention to be replicated                                                              | Table 1 (explanation) | no  | no  | no  | no  | no  | no  | no |
| 548 | S25 | Standards for Reporting Implementation Research  | Pincock, Hilary    | A description of the intervention                                                                   | Descriptions of implementation strategies and complex interventions are criticised if they are not clearly labelled, poorly described, rarely justified, not easy to understand and not sufficiently detailed to enable the intervention to be replicated                                                              | Table 1 (explanation) | no  | no  | no  | no  | no  | no  | no |
| 549 | S25 | Standards for Reporting Implementation Research  | Pincock, Hilary    | Any subgroups recruited for additional research                                                     | Typically in implementation studies, subgroups are recruited for additional research                                                                                                                                                                                                                                   | Table 1 (explanation) | no  | no  | no  | yes | no  | no  | no |
| 550 | S25 | Standards for Reporting Implementation Research  | Pincock, Hilary    | Defined pre-specified primary and other outcomes                                                    | Figure 2 illustrates the outcomes relevant to implementation science and the standards that apply to them                                                                                                                                                                                                              | Table 1 (explanation) | no  | no  | no  | no  | no  | no  | no |
| 551 | S25 | Standards for Reporting Implementation Research  | Pincock, Hilary    | Defined pre-specified primary and other outcomes                                                    | Figure 2 illustrates the outcomes relevant to implementation science and the standards that apply to them                                                                                                                                                                                                              | Table 1 (explanation) | no  | no  | no  | no  | no  | no  | no |
| 552 | S25 | Standards for Reporting Implementation Research  | Pincock, Hilary    | Process evaluation objectives and outcomes related to process evaluation (or formative evaluation)  | A process evaluation (or formative evaluation) is a critical component of implementation science                                                                                                                                                                                                                       | Table 1 (explanation) | no  | no  | no  | yes | no  | no  | no |
| 553 | S25 | Standards for Reporting Implementation Research  | Pincock, Hilary    | Methods for resource use, costs, economic outcomes and evaluation of the implementation strategy    | Economic evaluation can inform future implementation strategies                                                                                                                                                                                                                                                        | Table 1 (explanation) | no  | no  | no  | yes | no  | no  | no |
| 554 | S25 | Standards for Reporting Implementation Research  | Pincock, Hilary    | Methods for resource use, costs, economic outcomes and evaluation of the implementation strategy    | Economic evaluation can inform future implementation strategies                                                                                                                                                                                                                                                        | Table 1 (explanation) | no  | no  | no  | yes | no  | no  | no |
| 555 | S25 | Standards for Reporting Implementation Research  | Pincock, Hilary    | Rationale for sample sizes (including sample size)                                                  | It is important to recruit sufficient participants                                                                                                                                                                                                                                                                     | Table 1 (explanation) | no  | no  | no  | yes | no  | no  | no |
| 556 | S25 | Standards for Reporting Implementation Research  | Pincock, Hilary    | Methods of analysis (with reasons for that choice)                                                  | Design-specific advice on reporting                                                                                                                                                                                                                                                                                    | Table 1 (explanation) | no  | no  | no  | yes | no  | no  | no |
| 557 | S25 | Standards for Reporting Implementation Research  | Pincock, Hilary    | Any a priori subgroup analyses (such as between subgroups)                                          | Subgroups should be specified a priori                                                                                                                                                                                                                                                                                 | Table 1 (explanation) | no  | no  | no  | yes | no  | no  | no |
| 558 | S25 | Standards for Reporting Implementation Research  | Pincock, Hilary    | Proportion recruited and characteristics of the population                                          | As in cluster RCTs, the populations need to be considered at two levels: the population targeted by the intervention and the population targeted by the evaluation                                                                                                                                                     | Table 1 (explanation) | no  | no  | no  | no  | yes | no  | no |





|     |     |                                                               |                                                                                     |                                                                       |                                                  |                       |                       |     |     |     |     |     |     |
|-----|-----|---------------------------------------------------------------|-------------------------------------------------------------------------------------|-----------------------------------------------------------------------|--------------------------------------------------|-----------------------|-----------------------|-----|-----|-----|-----|-----|-----|
| 628 | S32 | The MAPS toolkit: mHealth assessment ar WHO                   | Groundwork: Contextual environment                                                  | Conducting a thorough assessment                                      | Assessment of scalability of th                  | LIST                  | p3, figure3, p11      | no  | no  | yes | yes | no  | no  |
| 629 | S32 | The MAPS toolkit: mHealth assessment ar WHO                   | Groundwork: Scientific basis                                                        | Evidence that your project team ha                                    | Development of scaling strate                    | LIST                  | p3, figure3, p12      | no  | no  | yes | yes | no  | no  |
| 630 | S32 | The MAPS toolkit: mHealth assessment ar WHO                   | Partnerships: Strategic engagement: Identifier that have the diversity of expertise | preparing for scaling up                                              | LIST                                             | p3, figure3, p25      | no                    | no  | no  | yes | no  | no  | no  |
| 631 | S32 | The MAPS toolkit: mHealth assessment ar WHO                   | Partnerships: Strategic engagement: Fostering bu                                    | Assessing each potential partner's r                                  | preparing for scaling up                         | LIST                  | p3, figure3, p25      | no  | no  | no  | yes | no  | no  |
| 632 | S32 | The MAPS toolkit: mHealth assessment ar WHO                   | Partnerships: Partnership sustainability:cultivating na                             | preparing for scaling up                                              | LIST                                             | p3, figure3, p26      | no                    | no  | no  | yes | no  | no  | no  |
| 633 | S32 | The MAPS toolkit: mHealth assessment ar WHO                   | Partnerships: Partnership sustainability:establishn na                              | preparing for scaling up                                              | LIST                                             | p3, figure3, p26      | no                    | no  | no  | yes | no  | yes | no  |
| 634 | S32 | The MAPS toolkit: mHealth assessment ar WHO                   | Financial health: Financial management: Program                                     | The project team should differentia                                   | Implementation of the strate                     | LIST                  | p3, figure3, p37      | no  | no  | no  | no  | no  | no  |
| 635 | S32 | The MAPS toolkit: mHealth assessment ar WHO                   | Financial health: Financial management: End-use                                     | the cost incurred by the user, which                                  | Implementation of the strate                     | LIST                  | p3, figure3, p37      | no  | yes | no  | yes | yes | no  |
| 636 | S32 | The MAPS toolkit: mHealth assessment ar WHO                   | Financial health: Financial management: Health s na                                 | Implementation of the strate                                          | LIST                                             | p3, figure3, p37      | no                    | yes | no  | yes | yes | no  | no  |
| 637 | S32 | The MAPS toolkit: mHealth assessment ar WHO                   | Financial health: Financial management: Forecast                                    | the economic costs of scaling up                                      | Implementation of the strate                     | LIST                  | p3, figure3, p37      | no  | no  | no  | yes | yes | no  |
| 638 | S32 | The MAPS toolkit: mHealth assessment ar WHO                   | Financial health: Financial model:Value chain ana                                   | exploring and documenting the inte                                    | Implementation of the strate                     | LIST                  | p3, figure3, p38      | no  | no  | yes | no  | no  | no  |
| 639 | S32 | The MAPS toolkit: mHealth assessment ar WHO                   | Financial health: Financial model:Business plan na                                  | Implementation of the strate                                          | LIST                                             | p3, figure3, p38      | no                    | no  | no  | yes | no  | no  | no  |
| 640 | S32 | The MAPS toolkit: mHealth assessment ar WHO                   | Financial health: Financial model:Sustainability of                                 | required to seek out and secure diff                                  | Implementation of the strate                     | LIST                  | p3, figure3, p38      | no  | no  | no  | no  | no  | yes |
| 641 | S32 | The MAPS toolkit: mHealth assessment ar WHO                   | Technology and architecture: Data: Data access a na                                 | Implementation of the strate                                          | LIST                                             | p48                   | no                    | no  | no  | yes | no  | no  | no  |
| 642 | S32 | The MAPS toolkit: mHealth assessment ar WHO                   | Technology and architecture: Data: Data security na                                 | Implementation of the strate                                          | LIST                                             | p48                   | no                    | no  | no  | yes | no  | no  | no  |
| 643 | S32 | The MAPS toolkit: mHealth assessment ar WHO                   | Technology and architecture: Data: Data transm na                                   | Implementation of the strate                                          | LIST                                             | p48                   | no                    | no  | no  | yes | no  | no  | no  |
| 644 | S32 | The MAPS toolkit: mHealth assessment ar WHO                   | Technology and architecture: Interoperability: Sy na                                | Implementation of the strate                                          | LIST                                             | p48                   | no                    | no  | no  | yes | no  | no  | no  |
| 645 | S32 | The MAPS toolkit: mHealth assessment ar WHO                   | Technology and architecture: Interoperability: De na                                | Implementation of the strate                                          | LIST                                             | p48                   | no                    | no  | no  | yes | no  | no  | no  |
| 646 | S32 | The MAPS toolkit: mHealth assessment ar WHO                   | Technology and architecture: Adaptability: Adapt na                                 | Implementation of the strate                                          | LIST                                             | p50                   | no                    | no  | yes | yes | no  | no  | no  |
| 647 | S32 | The MAPS toolkit: mHealth assessment ar WHO                   | Technology and architecture: Adaptability: Adapt na                                 | Implementation of the strate                                          | LIST                                             | p50                   | no                    | no  | yes | yes | no  | no  | no  |
| 648 | S32 | The MAPS toolkit: mHealth assessment ar WHO                   | Technology and architecture: Adaptability: Transl                                   | describes the capacity of an mHealt                                   | Implementation of the strate                     | LIST                  | p50                   | no  | no  | yes | yes | no  | no  |
| 649 | S32 | The MAPS toolkit: mHealth assessment ar WHO                   | Operations: Personnel: Workforce development na                                     | Implementation of the strate                                          | LIST                                             | p62                   | no                    | no  | no  | yes | no  | no  | no  |
| 650 | S32 | The MAPS toolkit: mHealth assessment ar WHO                   | Operations: Personnel:Leadership na                                                 | Implementation of the strate                                          | LIST                                             | p62                   | no                    | no  | no  | yes | no  | no  | no  |
| 651 | S32 | The MAPS toolkit: mHealth assessment ar WHO                   | Operations: Training & support: User training na                                    | Implementation of the strate                                          | LIST                                             | p62                   | no                    | no  | no  | yes | no  | no  | no  |
| 652 | S32 | The MAPS toolkit: mHealth assessment ar WHO                   | Operations: Training & support: Supervision na                                      | Implementation of the strate                                          | LIST                                             | p62                   | no                    | no  | no  | yes | no  | no  | no  |
| 653 | S32 | The MAPS toolkit: mHealth assessment ar WHO                   | Operations: Training & support: User and technic na                                 | Implementation of the strate                                          | LIST                                             | p62                   | no                    | no  | no  | yes | no  | no  | no  |
| 654 | S32 | The MAPS toolkit: mHealth assessment ar WHO                   | Operations: Outreach & sensitization: Stakeholde na                                 | Implementation of the strate                                          | LIST                                             | p62                   | no                    | no  | no  | yes | no  | no  | no  |
| 655 | S32 | The MAPS toolkit: mHealth assessment ar WHO                   | Operations: Outreach & sensitization: Communit na                                   | Implementation of the strate                                          | LIST                                             | p62                   | no                    | no  | no  | yes | no  | no  | no  |
| 656 | S32 | The MAPS toolkit: mHealth assessment ar WHO                   | Operations: Contingency planning: Technical con na                                  | Implementation of the strate                                          | LIST                                             | p62                   | no                    | no  | no  | yes | no  | no  | no  |
| 657 | S32 | The MAPS toolkit: mHealth assessment ar WHO                   | Operations: Contingency planning: Retention of a na                                 | Implementation of the strate                                          | LIST                                             | p62                   | no                    | no  | no  | yes | no  | no  | no  |
| 658 | S32 | The MAPS toolkit: mHealth assessment ar WHO                   | Monitoring and evaluation: Process monitoring: I                                    | PM: Routine and ongoing monitorin                                     | Evaluation and monitoring                        | LIST                  | p76                   | no  | no  | no  | yes | yes | no  |
| 659 | S32 | The MAPS toolkit: mHealth assessment ar WHO                   | Monitoring and evaluation: Process monitoring: I                                    | na                                                                    | Evaluation and monitoring                        | LIST                  | p76                   | no  | no  | no  | yes | yes | no  |
| 660 | S32 | The MAPS toolkit: mHealth assessment ar WHO                   | Monitoring and evaluation: Evaluation research: na                                  | Evaluation and monitoring                                             | LIST                                             | p76                   | no                    | no  | no  | yes | no  | no  | no  |
| 661 | S32 | The MAPS toolkit: mHealth assessment ar WHO                   | Monitoring and evaluation: Evaluation research: na                                  | Evaluation and monitoring                                             | LIST                                             | p76                   | no                    | no  | no  | yes | no  | no  | no  |
| 662 | S32 | The MAPS toolkit: mHealth assessment ar WHO                   | Monitoring and evaluation: Evaluation research: na                                  | Evaluation and monitoring                                             | LIST                                             | p76                   | no                    | no  | no  | yes | no  | yes | no  |
| 663 | S33 | Ten dimensions of scaling up reproductive US Agency for Inter | A question of change: How do we know when we h                                      | Is there enough capacity to scale up                                  | Development of scaling strate list               | box page 1            | no                    | no  | yes | yes | no  | no  | no  |
| 664 | S33 | Ten dimensions of scaling up reproductive US Agency for Inter | A question of capacity: What management, techn                                      | ological and policy Competency cap                                    | Development of scaling strate list               | box page 1            | no                    | no  | no  | yes | no  | no  | no  |
| 665 | S33 | Ten dimensions of scaling up reproductive US Agency for Inter | A question of strategy: What strategies most effe                                   | How does scaling up occur? Replica                                    | Development of scaling strate list               | box page 1            | no                    | no  | no  | no  | no  | no  | no  |
| 666 | S33 | Ten dimensions of scaling up reproductive US Agency for Inter | A question of impact: How should the desired im                                     | The impact of a scaled-up program: Development of scaling strate list | Development of scaling strate list               | box page 1            | no                    | no  | no  | yes | no  | no  | no  |
| 667 | S33 | Ten dimensions of scaling up reproductive US Agency for Inter | A question of sustainability: How do we maintain                                    | What does sustainability mean in re                                   | Development of scaling strate list               | box page 1            | no                    | no  | no  | no  | no  | no  | no  |
| 668 | S33 | Ten dimensions of scaling up reproductive US Agency for Inter | A question of access: What kind of coverage is en                                   | Breadth; Depth                                                        | Development of scaling strate list               | box page 1            | no                    | no  | no  | yes | no  | no  | no  |
| 669 | S33 | Ten dimensions of scaling up reproductive US Agency for Inter | A question of supply and demand: What is being                                      | Recognizing demand and supply coi                                     | Development of scaling strate list               | box page 1            | no                    | yes | yes | yes | no  | no  | no  |
| 670 | S33 | Ten dimensions of scaling up reproductive US Agency for Inter | A question of cost: How much will it cost to scale                                  | Estimating start-up costs; Estimatin                                  | Development of scaling strate list               | box page 1            | no                    | no  | no  | yes | no  | no  | no  |
| 671 | S33 | Ten dimensions of scaling up reproductive US Agency for Inter | A question of resources: What resources are neer                                    | Financing scaling up: How much for                                    | Development of scaling strate list               | box page 1            | no                    | no  | no  | yes | no  | no  | no  |
| 672 | S33 | Ten dimensions of scaling up reproductive US Agency for Inter | A question of timing: When is the right time to sc                                  | Is the technology compatible with c                                   | Development of scaling strate list               | box page 1            | no                    | no  | yes | yes | no  | no  | no  |
| 673 | S34 | Scaling up health service delivery: from pi Simmons, Ruth     | Innovation                                                                          | health interventions and/or other p                                   | Development of scaling strate list               | Figure 1.1 (Scaling t | no                    | yes | yes | yes | yes | yes | no  |
| 674 | S34 | Scaling up health service delivery: from pi Simmons, Ruth     | User organization                                                                   | the institution(s) or organization(s)                                 | Development of scaling strate list               | Figure 1.1 (Scaling t | no                    | yes | yes | yes | yes | yes | no  |
| 675 | S34 | Scaling up health service delivery: from pi Simmons, Ruth     | Environment                                                                         | conditions and institutions which ar                                  | Assessment of scalability of th                  | Figure 1.1 (Scaling t | no                    | no  | no  | yes | no  | no  | no  |
| 676 | S34 | Scaling up health service delivery: from pi Simmons, Ruth     | Resource team                                                                       | individuals and organizations that si                                 | preparing for scaling up                         | list                  | Figure 1.1 (Scaling t | no  | no  | no  | yes | no  | no  |
| 677 | S34 | Scaling up health service delivery: from pi Simmons, Ruth     | Scaling-up strategy                                                                 | plans and actions necessary to fully                                  | Development of scaling strate list               | Figure 1.1 (Scaling t | no                    | yes | no  | yes | no  | no  | no  |
| 678 | S34 | Scaling up health service delivery: from pi Simmons, Ruth     | the type of scaling up : vertical scaling up                                        | institutionalization through policy, i                                | Development of scaling strategy                  | (Practical guidance   | no                    | yes | no  | yes | no  | no  | no  |
| 679 | S34 | Scaling up health service delivery: from pi Simmons, Ruth     | the type of scaling up : horizontal scaling up (exp                                 | different geographic sites or can be                                  | Development of scaling strategy                  | (Practical guidance   | no                    | yes | no  | yes | no  | no  | no  |
| 680 | S34 | Scaling up health service delivery: from pi Simmons, Ruth     | the type of scaling up : diversification                                            | Diversification, also called functio                                  | Development of scaling strategy                  | (Practical guidance   | no                    | yes | no  | yes | no  | no  | no  |
| 681 | S34 | Scaling up health service delivery: from pi Simmons, Ruth     | the type of scaling up : spontaneous scaling up                                     | refers to diffusion of the innovation                                 | Development of scaling strategy                  | (Practical guidance   | no                    | no  | yes | no  | no  | no  | no  |
| 682 | S34 | Scaling up health service delivery: from pi Simmons, Ruth     | Strategic choice: dissemination and advocacy: pe na                                 | Development of scaling strategy                                       | (Practical guidance                              | no                    | no                    | no  | yes | no  | no  | no  | no  |
| 683 | S34 | Scaling up health service delivery: from pi Simmons, Ruth     | Strategic choice: dissemination and advocacy:imj na                                 | Development of scaling strategy                                       | (Practical guidance                              | no                    | no                    | no  | yes | no  | yes | no  | no  |
| 684 | S34 | Scaling up health service delivery: from pi Simmons, Ruth     | Strategic choice: the organizational process: scop na                               | Development of scaling strategy                                       | (Practical guidance                              | no                    | no                    | no  | yes | no  | no  | no  | no  |
| 685 | S34 | Scaling up health service delivery: from pi Simmons, Ruth     | Strategic choice: the organizational process: pac na                                | Development of scaling strategy                                       | (Practical guidance                              | no                    | no                    | no  | yes | no  | no  | no  | no  |
| 686 | S34 | Scaling up health service delivery: from pi Simmons, Ruth     | Strategic choice: the organizational process: num na                                | Development of scaling strategy                                       | (Practical guidance                              | no                    | no                    | no  | yes | no  | no  | no  | no  |
| 687 | S34 | Scaling up health service delivery: from pi Simmons, Ruth     | Strategic choice: the organizational process: cent na                               | Development of scaling strategy                                       | (Practical guidance                              | no                    | no                    | no  | yes | no  | no  | no  | no  |
| 688 | S34 | Scaling up health service delivery: from pi Simmons, Ruth     | Strategic choice: the organizational process: adaj na                               | Development of scaling strategy                                       | (Practical guidance                              | no                    | no                    | no  | yes | no  | no  | no  | no  |
| 689 | S34 | Scaling up health service delivery: from pi Simmons, Ruth     | Strategic choice: the organizational process: part na                               | Development of scaling strategy                                       | (Practical guidance                              | no                    | no                    | no  | yes | no  | no  | no  | no  |
| 690 | S34 | Scaling up health service delivery: from pi Simmons, Ruth     | Strategic choice: costs and resource mobilization na                                | preparing for scaling up                                              | (Practical guidance                              | no                    | no                    | no  | yes | no  | no  | no  | no  |
| 691 | S34 | Scaling up health service delivery: from pi Simmons, Ruth     | Strategic choice: costs and resource mobilization na                                | preparing for scaling up                                              | (Practical guidance                              | no                    | no                    | no  | yes | no  | no  | no  | no  |
| 692 | S34 | Scaling up health service delivery: from pi Simmons, Ruth     | Strategic choice: costs and resource mobilization na                                | preparing for scaling up                                              | (Practical guidance                              | no                    | no                    | no  | yes | no  | no  | no  | no  |
| 693 | S34 | Scaling up health service delivery: from pi Simmons, Ruth     | Strategic choice: monitoring and evaluation: indi                                   | examples: extent to which essential                                   | evaluation of the monitoring (e.g. training, mar | (Practical guidance   | no                    | no  | no  | yes | yes | no  | no  |
| 694 | S34 | Scaling up health service delivery: from pi Simmons, Ruth     | Strategic choice: monitoring and evaluation: indi                                   | Examples: number of sites implement                                   | evaluation of the monitoring (e.g. training, mar | (Practical guidance   | no                    | no  | no  | yes | yes | no  | no  |
| 695 | S34 | Scaling up health service delivery: from pi Simmons, Ruth     | Strategic choice: monitoring and evaluation: indi                                   | Examples: number of people with ac                                    | evaluation of the monitoring (e.g. training, mar | (Practical guidance   | no                    | no  | no  | yes | yes | no  | no  |
| 696 | S34 | Scaling up health service delivery: from pi Simmons, Ruth     | Strategic choice: monitoring and evaluation: serv na                                | Evaluation and monitoring                                             | (Practical guidance                              | no                    | no                    | no  | yes | no  | no  | no  | no  |

|     |     |                                                                                                                     |                                                        |                                                                                                                                                                              |                                    |         |    |     |     |     |    |
|-----|-----|---------------------------------------------------------------------------------------------------------------------|--------------------------------------------------------|------------------------------------------------------------------------------------------------------------------------------------------------------------------------------|------------------------------------|---------|----|-----|-----|-----|----|
| 697 | S34 | Scaling up health service delivery: from pi Simmons, Ruth                                                           | Strategic choice: monitoring and evaluation: spec na   | Evaluation and monitoring                                                                                                                                                    | (Practical guidance no             | no      | no | yes | no  | no  | no |
| 698 | S34 | Scaling up health service delivery: from pi Simmons, Ruth                                                           | Strategic choice: monitoring and evaluation: loca na   | Evaluation and monitoring                                                                                                                                                    | (Practical guidance no             | no      | no | yes | no  | no  | no |
| 699 | S34 | Scaling up health service delivery: from pi Simmons, Ruth                                                           | Strategic choice: monitoring and evaluation: envi na   | Evaluation and monitoring                                                                                                                                                    | (Practical guidance no             | no      | no | yes | no  | no  | no |
| 700 | S35 | An approach to rapid scale up Using HIV// WHO                                                                       | Establish the country's leadership and coordinating a  | preparing for scaling up LIST                                                                                                                                                | Box 6                              | no      | no | no  | yes | no  | no |
| 701 | S35 | An approach to rapid scale up Using HIV// WHO                                                                       | Identify the [AIDS care] expert group na               | preparing for scaling up LIST                                                                                                                                                | Box 6                              | no      | no | no  | yes | no  | no |
| 702 | S35 | An approach to rapid scale up Using HIV// WHO                                                                       | Understand the full scale intended na                  | Development of scaling strate LIST                                                                                                                                           | Box 6                              | no      | no | no  | yes | no  | no |
| 703 | S35 | An approach to rapid scale up Using HIV// WHO                                                                       | Organize the fi rst phase in the multiplicative app na | Implementation of the stratej LIST                                                                                                                                           | Box 6                              | no      | no | no  | no  | no  | no |
| 704 | S35 | An approach to rapid scale up Using HIV// WHO                                                                       | Organize the fi rst phase in the multiplicative app na | Implementation of the stratej LIST                                                                                                                                           | Box 6                              | no      | no | no  | yes | no  | no |
| 705 | S35 | An approach to rapid scale up Using HIV// WHO                                                                       | Organize the fi rst phase in the multiplicative app na | Implementation of the stratej LIST                                                                                                                                           | Box 6                              | no      | no | no  | yes | no  | no |
| 706 | S35 | An approach to rapid scale up Using HIV// WHO                                                                       | Organize the fi rst phase in the multiplicative app na | Implementation of the stratej LIST                                                                                                                                           | Box 6                              | no      | no | no  | no  | no  | no |
| 707 | S35 | An approach to rapid scale up Using HIV// WHO                                                                       | Organize the fi rst phase in the multiplicative app na | Implementation of the stratej LIST                                                                                                                                           | Box 6                              | no      | no | no  | yes | no  | no |
| 708 | S35 | An approach to rapid scale up Using HIV// WHO                                                                       | Organize the fi rst phase in the multiplicative app na | Implementation of the stratej LIST                                                                                                                                           | Box 6                              | no      | no | no  | yes | no  | no |
| 709 | S35 | An approach to rapid scale up Using HIV// WHO                                                                       | Organize the second phase in the multiplicative a na   | Implementation of the stratej LIST                                                                                                                                           | Box 6                              | no      | no | no  | yes | no  | no |
| 710 | S35 | An approach to rapid scale up Using HIV// WHO                                                                       | Organize the second phase in the multiplicative a na   | Implementation of the stratej LIST                                                                                                                                           | Box 6                              | no      | no | no  | yes | no  | no |
| 711 | S35 | An approach to rapid scale up Using HIV// WHO                                                                       | Organize the second phase in the multiplicative a na   | Implementation of the stratej LIST                                                                                                                                           | Box 6                              | no      | no | no  | yes | no  | no |
| 712 | S35 | An approach to rapid scale up Using HIV// WHO                                                                       | Organize the second phase in the multiplicative a na   | Implementation of the stratej LIST                                                                                                                                           | Box 6                              | no      | no | no  | no  | no  | no |
| 713 | S35 | An approach to rapid scale up Using HIV// WHO                                                                       | Organize the second phase in the multiplicative a na   | Implementation of the stratej LIST                                                                                                                                           | Box 6                              | no      | no | no  | yes | no  | no |
| 714 | S35 | An approach to rapid scale up Using HIV// WHO                                                                       | Organize additional phases of scale-up na              | Implementation of the stratej LIST                                                                                                                                           | Box 6                              | no      | no | no  | yes | no  | no |
| 715 | S35 | An approach to rapid scale up Using HIV// WHO                                                                       | List and understand the different factors involvec na  | Evaluation and monitoring LIST                                                                                                                                               | Box 6                              | no      | no | no  | yes | no  | no |
| 716 | S35 | An approach to rapid scale up Using HIV// WHO                                                                       | Be aware of the factors that constrain scale-up na     | Evaluation and monitoring LIST                                                                                                                                               | Box 6                              | no      | no | no  | yes | no  | no |
| 717 | S36 | Scaling Up Global Health Interventions: A Yamey, Gavin                                                              | Attributes of the Tool or Service Being Scaled Up      | Simplicity; Scientifically robust tech                                                                                                                                       | Development of scaling strate LIST | Page 2  | no | no  | no  | no  | no |
| 718 | S36 | Scaling Up Global Health Interventions: A Yamey, Gavin                                                              | Attributes of the Implementers:                        | Strong leadership and governance;                                                                                                                                            | Development of scaling strate LIST | Page 2  | no | no  | no  | yes | no |
| 719 | S36 | Scaling Up Global Health Interventions: A Yamey, Gavin                                                              | The Chosen Delivery Strategy:                          | Applying diffusion and social netw                                                                                                                                           | Development of scaling strate LIST | Page 2  | no | no  | no  | yes | no |
| 720 | S36 | Scaling Up Global Health Interventions: A Yamey, Gavin                                                              | Attributes of the "Adopting" Community                 | An engaged, "activated" communi                                                                                                                                              | Development of scaling strate LIST | Page 2  | no | no  | no  | no  | no |
| 721 | S36 | Scaling Up Global Health Interventions: A Yamey, Gavin                                                              | Socio-Political Context                                | Political will and national policies;                                                                                                                                        | Development of scaling strate LIST | Page 2  | no | no  | no  | yes | no |
| 722 | S36 | Scaling Up Global Health Interventions: A Yamey, Gavin                                                              | Research Context                                       | Incorporating research into imple                                                                                                                                            | Development of scaling strate LIST | Page 2  | no | no  | no  | yes | no |
| 723 | S37 | Scaling Up—From Vision to Large-Scale Cf Larry, Cooley                                                              | Develop a Scaling Up Plan : Create a Vision: the P     | What Is Being Scaled Up?                                                                                                                                                     | Development of scaling strate LIST | page1   | no | no  | no  | yes | no |
| 724 | S37 | Scaling Up—From Vision to Large-Scale Cf Larry, Cooley                                                              | Develop a Scaling Up Plan : Create a Vision: the P     | How Will Scaling Up Be Accomplish                                                                                                                                            | Development of scaling strate LIST | page1   | no | no  | no  | yes | no |
| 725 | S37 | Scaling Up—From Vision to Large-Scale Cf Larry, Cooley                                                              | Develop a Scaling Up Plan : Create a Vision: Orga      | Who Performs the Key Functions?                                                                                                                                              | Development of scaling strate LIST | page1   | no | no  | no  | yes | no |
| 726 | S37 | Scaling Up—From Vision to Large-Scale Cf Larry, Cooley                                                              | Develop a Scaling Up Plan : Create a Vision: Dime      | Where and For Whom Does Scaling                                                                                                                                              | Development of scaling strate LIST | page1   | no | no  | no  | yes | no |
| 727 | S37 | Scaling Up—From Vision to Large-Scale Cf Larry, Cooley                                                              | Develop a Scaling Up Plan : Assess Scalability: det    | na                                                                                                                                                                           | Development of scaling strate LIST | page1   | no | no  | no  | yes | no |
| 728 | S37 | Scaling Up—From Vision to Large-Scale Cf Larry, Cooley                                                              | Develop a Scaling Up Plan : Assess Scalability: Ana    | na                                                                                                                                                                           | Development of scaling strate LIST | page1   | no | no  | no  | yes | no |
| 729 | S37 | Scaling Up—From Vision to Large-Scale Cf Larry, Cooley                                                              | Develop a Scaling Up Plan : Fill Information Gaps      | Documentation of the model, Analy                                                                                                                                            | Development of scaling strate LIST | page1   | no | no  | yes | yes | no |
| 730 | S37 | Scaling Up—From Vision to Large-Scale Cf Larry, Cooley                                                              | Develop a Scaling Up Plan : Prepare a Scaling Up       | na                                                                                                                                                                           | Development of scaling strate LIST | page1   | no | no  | no  | yes | no |
| 731 | S37 | Scaling Up—From Vision to Large-Scale Cf Larry, Cooley                                                              | Establish the Pre-Conditions for Scaling Up: Legit     | na                                                                                                                                                                           | preparing for scaling up LIST      | page1   | no | no  | yes | yes | no |
| 732 | S37 | Scaling Up—From Vision to Large-Scale Cf Larry, Cooley                                                              | Establish the Pre-Conditions for Scaling Up: Build     | na                                                                                                                                                                           | preparing for scaling up LIST      | page1   | no | no  | yes | yes | no |
| 733 | S37 | Scaling Up—From Vision to Large-Scale Cf Larry, Cooley                                                              | Establish the Pre-Conditions for Scaling Up: Realiz    | na                                                                                                                                                                           | preparing for scaling up LIST      | page1   | no | no  | yes | yes | no |
| 734 | S37 | Scaling Up—From Vision to Large-Scale Cf Larry, Cooley                                                              | Implement the Scaling Up Process: Modify Orgar         | na                                                                                                                                                                           | Implementation of the stratej LIST | page1   | no | no  | no  | yes | no |
| 735 | S37 | Scaling Up—From Vision to Large-Scale Cf Larry, Cooley                                                              | Implement the Scaling Up Process: Coordinate Ac        | na                                                                                                                                                                           | Implementation of the stratej LIST | page1   | no | no  | no  | yes | no |
| 736 | S37 | Scaling Up—From Vision to Large-Scale Cf Larry, Cooley                                                              | Implement the Scaling Up Process : Adapt Stratej       | na                                                                                                                                                                           | Implementation of the stratej LIST | page1   | no | no  | no  | yes | no |
| 737 | S38 | A model for scale up of family health inno Elizabeth H, Bradley; Assess: Understand user group receptivity and er   | na                                                     | Assessment of scalability of th list                                                                                                                                         | Figure 3: Schematic no             | no      | no | no  | yes | no  | no |
| 738 | S38 | A model for scale up of family health inno Elizabeth H, Bradley; Innovate: Design and package innovation to fit w   | na                                                     | Development of scaling strate list                                                                                                                                           | Figure 3: Schematic no             | no      | no | no  | yes | no  | no |
| 739 | S38 | A model for scale up of family health inno Elizabeth H, Bradley; Develop: Build support and address resistance in   | na                                                     | preparing for scaling up list                                                                                                                                                | Figure 3: Schematic no             | no      | no | no  | yes | no  | no |
| 740 | S38 | A model for scale up of family health inno Elizabeth H, Bradley; Engage: introduce, translate, and integrate the in | na                                                     | Implementation of the stratej list                                                                                                                                           | Figure 3: Schematic no             | no      | no | no  | yes | no  | no |
| 741 | S38 | A model for scale up of family health inno Elizabeth H, Bradley; Devolve: User group release and spread the inno    | na                                                     | Implementation of the stratej list                                                                                                                                           | Figure 3: Schematic no             | no      | no | no  | yes | no  | no |
| 742 | S39 | Scale up of services for mental health in Ic Julian, Eaton                                                          | Situation analysis: Gather information about need      | ing a) with local stakeholders including patients, providers, and community members                                                                                          | Development of scaling strate LIST | figure3 | no | no  | no  | yes | no |
| 743 | S39 | Scale up of services for mental health in Ic Julian, Eaton                                                          | Situation analysis: Identify available resources:• I   | Identify available human resources and identify the available health services                                                                                                | Development of scaling strate LIST | figure3 | no | no  | no  | yes | no |
| 744 | S39 | Scale up of services for mental health in Ic Julian, Eaton                                                          | Planning: Define priority conditions for service pro   | Development of scaling strate LIST                                                                                                                                           | Development of scaling strate LIST | figure3 | no | no  | no  | yes | no |
| 745 | S39 | Scale up of services for mental health in Ic Julian, Eaton                                                          | Planning: Design a method of service delivery the      | Develop a strong planning and implementation approach with representation from all stakeholders and external experts as appropriate                                          | Development of scaling strate LIST | figure3 | no | no  | no  | yes | no |
| 746 | S39 | Scale up of services for mental health in Ic Julian, Eaton                                                          | Planning: Identify the barriers to scaling up and d    | Identify a mental health focal person preparing for scaling up                                                                                                               | Development of scaling strate LIST | figure3 | no | no  | no  | yes | no |
| 747 | S39 | Scale up of services for mental health in Ic Julian, Eaton                                                          | Implementation: Build coalition of stakeholders t      | Strengthen management structures to protect and distribute benefits                                                                                                          | Implementation of the stratej LIST | figure3 | no | no  | no  | yes | no |
| 748 | S39 | Scale up of services for mental health in Ic Julian, Eaton                                                          | Implementation: Implement scaling up strategy a        | Raise community awareness about mental health and identify the role of promotion, prevention, human rights, stigma, how to access services, include patients in this process | Implementation of the stratej LIST | figure3 | no | no  | no  | yes | no |
| 749 | S39 | Scale up of services for mental health in Ic Julian, Eaton                                                          | Evaluation: Monitor/evaluate the intervention M        | Integrate mental health into existing health information systems                                                                                                             | Development of scaling strate LIST | figure3 | no | no  | no  | yes | no |
| 750 | S39 | Scale up of services for mental health in Ic Julian, Eaton                                                          | Evaluation: Disseminate findings in relevant forum     | Develop partnership with academic institutions for formal evaluation and research                                                                                            | Development of scaling strate LIST | figure3 | no | no  | no  | yes | no |
